# Supplementary material for: Landscape effects on global soil pathogenic fungal diversity across spatial scales
Source: Springer Nature journal article supplement (doi:10.1038/s41467-025-67929-5), 2026-01-09
Supplement: MOESM1 [file 41467_2025_67929_MOESM1_ESM.pdf]

**Title: Landscape effects on global soil pathogenic fungal diversity  
across spatial scales**

**Supplementary Information**

Supplementary Tables 1–9

Supplementary Figs. 1–31

**Supplementary Table 1.** Predictors, coefficients (estimate slope), standard errors (se), t-values and *p*-values of the multivariate Generalized Additive Models for Location, Scale, and Shape (GAMLSS) on (a) leaf/fruit/seed-associated (LFSA) and (b) root-associated (RA) fungal alpha diversity within the 500 m radius around the sampling plot. Statistical tests are two-sided Wald tests from multivariate GAMLSS without adjustment for multiple comparisons. Significance relationships are marked in bold.

(a) LFSA fungi

| Predictor                   | Diversity | Overall      |              |              |                  | Forest        |              |               |                 | Grassland     |              |               |                  |
|-----------------------------|-----------|--------------|--------------|--------------|------------------|---------------|--------------|---------------|-----------------|---------------|--------------|---------------|------------------|
|                             |           | Coefficient  | se           | t-value      | <i>p</i> -value  | Coefficient   | se           | t-value       | <i>p</i> -value | Coefficient   | se           | t-value       | <i>p</i> -value  |
| <b>Landscape complexity</b> | Richness  | <b>0.037</b> | <b>0.011</b> | <b>3.355</b> | <b>0.001</b>     | 0.008         | 0.014        | 0.584         | 0.560           | <b>0.062</b>  | <b>0.029</b> | <b>2.165</b>  | <b>0.032</b>     |
|                             | Shannon   | 0.021        | 0.011        | 1.795        | 0.073            | 0.015         | 0.018        | 0.840         | 0.402           | 0.018         | 0.024        | 0.769         | 0.444            |
|                             | Abundance | <b>0.042</b> | <b>0.012</b> | <b>3.435</b> | <b>0.001</b>     | <b>-0.037</b> | <b>0.014</b> | <b>-2.551</b> | <b>0.011</b>    | <b>0.081</b>  | <b>0.030</b> | <b>2.662</b>  | <b>0.009</b>     |
| <b>Grass cover</b>          | Richness  | 0.004        | 0.064        | 0.057        | 0.955            | <0.001        | 0.111        | -0.002        | 0.999           | -0.060        | 0.113        | -0.534        | 0.595            |
|                             | Shannon   | -0.056       | 0.067        | -0.836       | 0.403            | -0.030        | 0.138        | -0.216        | 0.829           | -0.022        | 0.094        | -0.237        | 0.813            |
|                             | Abundance | 0.063        | 0.072        | 0.875        | 0.382            | 0.041         | 0.113        | 0.359         | 0.720           | 0.041         | 0.107        | 0.384         | 0.702            |
| <b>Crop cover</b>           | Richness  | <b>0.226</b> | <b>0.060</b> | <b>3.754</b> | <b>&lt;0.001</b> | 0.063         | 0.106        | 0.595         | 0.553           | <b>-0.436</b> | <b>0.107</b> | <b>-4.087</b> | <b>&lt;0.001</b> |
|                             | Shannon   | <b>0.155</b> | <b>0.063</b> | <b>2.444</b> | <b>0.015</b>     | -0.098        | 0.132        | -0.742        | 0.459           | <b>-0.333</b> | <b>0.089</b> | <b>-3.736</b> | <b>&lt;0.001</b> |
|                             | Abundance | <b>0.268</b> | <b>0.068</b> | <b>3.925</b> | <b>&lt;0.001</b> | <b>0.222</b>  | <b>0.108</b> | <b>2.062</b>  | <b>0.040</b>    | -0.148        | 0.102        | -1.454        | 0.148            |
| <b>Tree cover</b>           | Richness  | -0.102       | 0.071        | -1.442       | 0.150            | -0.116        | 0.118        | -0.985        | 0.326           | <b>-0.636</b> | <b>0.135</b> | <b>-4.726</b> | <b>&lt;0.001</b> |
|                             | Shannon   | -0.124       | 0.075        | -1.660       | 0.098            | -0.218        | 0.147        | -1.485        | 0.139           | <b>-0.469</b> | <b>0.112</b> | <b>-4.174</b> | <b>&lt;0.001</b> |
|                             | Abundance | -0.026       | 0.080        | -0.321       | 0.749            | -0.087        | 0.120        | -0.726        | 0.469           | -0.167        | 0.090        | -1.854        | 0.066            |
| <b>Longitude</b>            | Richness  | -0.007       | 0.031        | -0.218       | 0.828            | -0.016        | 0.030        | -0.524        | 0.601           | 0.120         | 0.135        | 0.885         | 0.378            |
|                             | Shannon   | 0.005        | 0.032        | 0.151        | 0.880            | -0.012        | 0.037        | -0.331        | 0.741           | <b>0.288</b>  | <b>0.113</b> | <b>2.547</b>  | <b>0.012</b>     |
|                             | Abundance | -0.017       | 0.035        | -0.493       | 0.622            | -0.057        | 0.030        | -1.883        | 0.061           | 0.146         | 0.152        | 0.959         | 0.339            |

(Continued from previous page)

| Predictor        | Diversity | Overall       |              |               |                  | Forest        |              |               |                  | Grassland     |              |               |                  |
|------------------|-----------|---------------|--------------|---------------|------------------|---------------|--------------|---------------|------------------|---------------|--------------|---------------|------------------|
|                  |           | Coefficient   | se           | t-value       | p-value          | Coefficient   | se           | t-value       | p-value          | Coefficient   | se           | t-value       | p-value          |
| <b>Latitude</b>  | Richness  | <b>-0.099</b> | <b>0.036</b> | <b>-2.717</b> | <b>0.007</b>     | <b>-0.089</b> | <b>0.039</b> | <b>-2.314</b> | <b>0.022</b>     | -0.023        | 0.083        | -0.279        | 0.781            |
|                  | Shannon   | <b>-0.129</b> | <b>0.038</b> | <b>-3.392</b> | <b>0.001</b>     | <b>-0.117</b> | <b>0.048</b> | <b>-2.441</b> | <b>0.016</b>     | 0.071         | 0.069        | 1.036         | 0.302            |
|                  | Abundance | -0.020        | 0.041        | -0.497        | 0.619            | <b>-0.134</b> | <b>0.039</b> | <b>-3.421</b> | <b>0.001</b>     | 0.175         | 0.095        | 1.843         | 0.068            |
| <b>Elevation</b> | Richness  | -0.070        | 0.044        | -1.613        | 0.107            | -0.067        | 0.062        | -1.071        | 0.285            | <b>-0.418</b> | <b>0.113</b> | <b>-3.715</b> | <b>&lt;0.001</b> |
|                  | Shannon   | -0.012        | 0.046        | -0.258        | 0.797            | -0.083        | 0.078        | -1.065        | 0.288            | <b>-0.294</b> | <b>0.094</b> | <b>-3.134</b> | <b>0.002</b>     |
|                  | Abundance | 0.031         | 0.049        | 0.621         | 0.535            | -0.029        | 0.063        | -0.466        | 0.642            | -0.191        | 0.118        | -1.613        | 0.109            |
| <b>MAT</b>       | Richness  | <b>0.095</b>  | <b>0.042</b> | <b>2.258</b>  | <b>0.024</b>     | <b>0.102</b>  | <b>0.048</b> | <b>2.107</b>  | <b>0.036</b>     | 0.127         | 0.220        | 0.577         | 0.565            |
|                  | Shannon   | 0.064         | 0.044        | 1.444         | 0.149            | 0.052         | 0.060        | 0.863         | 0.389            | 0.246         | 0.183        | 1.343         | 0.182            |
|                  | Abundance | <b>0.223</b>  | <b>0.047</b> | <b>4.693</b>  | <b>&lt;0.001</b> | 0.080         | 0.049        | 1.624         | 0.106            | -0.010        | 0.237        | -0.044        | 0.965            |
| <b>MAP</b>       | Richness  | -0.003        | 0.034        | -0.081        | 0.935            | <b>-0.129</b> | <b>0.042</b> | <b>-3.086</b> | <b>0.002</b>     | <b>-0.240</b> | <b>0.108</b> | <b>-2.226</b> | <b>0.028</b>     |
|                  | Shannon   | -0.063        | 0.036        | -1.768        | 0.078            | -0.097        | 0.052        | -1.855        | 0.065            | <b>-0.219</b> | <b>0.090</b> | <b>-2.431</b> | <b>0.016</b>     |
|                  | Abundance | 0.049         | 0.038        | 1.272         | 0.204            | -0.141        | <b>0.042</b> | <b>-3.331</b> | <b>0.001</b>     | -0.198        | 0.121        | -1.643        | 0.103            |
| <b>Clay</b>      | Richness  | <b>0.175</b>  | <b>0.033</b> | <b>5.264</b>  | <b>&lt;0.001</b> | 0.250         | <b>0.034</b> | <b>7.306</b>  | <b>&lt;0.001</b> | -0.111        | 0.082        | -1.343        | 0.182            |
|                  | Shannon   | <b>0.117</b>  | <b>0.035</b> | <b>3.357</b>  | <b>0.001</b>     | 0.122         | <b>0.043</b> | <b>2.864</b>  | <b>0.005</b>     | <b>-0.166</b> | <b>0.069</b> | <b>-2.415</b> | <b>0.017</b>     |
|                  | Abundance | <b>0.109</b>  | <b>0.038</b> | <b>2.893</b>  | <b>0.004</b>     | 0.245         | <b>0.035</b> | <b>7.050</b>  | <b>&lt;0.001</b> | 0.151         | 0.091        | 1.653         | 0.101            |
| <b>Silt</b>      | Richness  | -0.029        | 0.033        | -0.873        | 0.383            | -0.035        | 0.033        | -1.044        | 0.298            | <b>0.236</b>  | <b>0.088</b> | <b>2.677</b>  | <b>0.008</b>     |
|                  | Shannon   | -0.011        | 0.034        | -0.308        | 0.758            | -0.001        | 0.042        | -0.030        | 0.976            | <b>0.266</b>  | <b>0.073</b> | <b>3.621</b>  | <b>&lt;0.001</b> |
|                  | Abundance | <b>-0.099</b> | <b>0.037</b> | <b>-2.664</b> | <b>0.008</b>     | <b>-0.071</b> | <b>0.034</b> | <b>-2.094</b> | <b>0.038</b>     | -0.188        | 0.096        | -1.965        | 0.052            |
| <b>pH</b>        | Richness  | <b>0.290</b>  | <b>0.040</b> | <b>7.217</b>  | <b>&lt;0.001</b> | <b>0.203</b>  | <b>0.045</b> | <b>4.503</b>  | <b>&lt;0.001</b> | <b>0.345</b>  | <b>0.080</b> | <b>4.318</b>  | <b>&lt;0.001</b> |
|                  | Shannon   | <b>0.300</b>  | <b>0.042</b> | <b>7.095</b>  | <b>&lt;0.001</b> | <b>0.275</b>  | <b>0.056</b> | <b>4.895</b>  | <b>&lt;0.001</b> | <b>0.236</b>  | <b>0.067</b> | <b>3.541</b>  | <b>0.001</b>     |
|                  | Abundance | <b>0.175</b>  | <b>0.045</b> | <b>3.852</b>  | <b>&lt;0.001</b> | 0.087         | 0.046        | 1.898         | 0.059            | <b>0.227</b>  | <b>0.091</b> | <b>2.502</b>  | <b>0.014</b>     |

| (Continued from previous page) |           |               |              |               |                  |               |              |               |                  |               |              |               |              |
|--------------------------------|-----------|---------------|--------------|---------------|------------------|---------------|--------------|---------------|------------------|---------------|--------------|---------------|--------------|
| Predictor                      | Diversity | Overall       |              |               |                  | Forest        |              |               |                  | Grassland     |              |               |              |
|                                |           | Coefficient   | se           | t-value       | p-value          | Coefficient   | se           | t-value       | p-value          | Coefficient   | se           | t-value       | p-value      |
| <b>Nitrogen</b>                | Richness  | 0.045         | 0.029        | 1.532         | 0.126            | 0.020         | 0.034        | 0.581         | 0.562            | 0.076         | 0.055        | 1.382         | 0.169        |
|                                | Shannon   | 0.046         | 0.031        | 1.504         | 0.133            | 0.003         | 0.043        | 0.067         | 0.947            | 0.055         | 0.046        | 1.202         | 0.232        |
|                                | Abundance | 0.033         | 0.033        | 1.007         | 0.314            | 0.026         | 0.035        | 0.750         | 0.454            | -0.066        | 0.061        | -1.082        | 0.281        |
| <b>C/N ratio</b>               | Richness  | <b>-0.128</b> | <b>0.032</b> | <b>-4.075</b> | <b>&lt;0.001</b> | -0.039        | 0.034        | -1.129        | 0.260            | -0.107        | 0.071        | -1.512        | 0.133        |
|                                | Shannon   | <b>-0.219</b> | <b>0.033</b> | <b>-6.619</b> | <b>&lt;0.001</b> | <b>-0.185</b> | <b>0.043</b> | <b>-4.334</b> | <b>&lt;0.001</b> | -0.044        | 0.059        | -0.738        | 0.462        |
|                                | Abundance | <b>-0.126</b> | <b>0.036</b> | <b>-3.523</b> | <b>&lt;0.001</b> | -0.050        | 0.035        | -1.446        | 0.150            | -0.037        | 0.079        | -0.470        | 0.639        |
| <b>(b) RA fungi</b>            |           |               |              |               |                  |               |              |               |                  |               |              |               |              |
| Predictor                      | Diversity | Overall       |              |               |                  | Forest        |              |               |                  | Grassland     |              |               |              |
|                                |           | Coefficient   | se           | t-value       | p-value          | Coefficient   | se           | t-value       | p-value          | Coefficient   | se           | t-value       | p-value      |
| <b>Landscape complexity</b>    | Richness  | <0.001        | 0.015        | 0.023         | 0.981            | -0.044        | 0.025        | -1.741        | 0.083            | 0.044         | 0.034        | 1.285         | 0.201        |
|                                | Shannon   | 0.007         | 0.016        | 0.469         | 0.639            | -0.023        | 0.025        | -0.923        | 0.357            | 0.001         | 0.038        | 0.033         | 0.974        |
|                                | Abundance | 0.024         | 0.016        | 1.497         | 0.135            | 0.034         | 0.026        | 1.314         | 0.190            | -0.037        | 0.044        | -0.848        | 0.398        |
| <b>Grass cover</b>             | Richness  | 0.025         | 0.090        | 0.276         | 0.783            | -0.233        | 0.199        | -1.171        | 0.243            | -0.085        | 0.135        | -0.629        | 0.530        |
|                                | Shannon   | 0.024         | 0.092        | 0.264         | 0.792            | -0.172        | 0.197        | -0.876        | 0.382            | -0.115        | 0.149        | -0.771        | 0.442        |
|                                | Abundance | 0.086         | 0.095        | 0.906         | 0.365            | 0.073         | 0.203        | 0.362         | 0.718            | -0.066        | 0.172        | -0.385        | 0.701        |
| <b>Crop cover</b>              | Richness  | 0.106         | 0.085        | 1.245         | 0.214            | -0.082        | 0.190        | -0.435        | 0.664            | -0.137        | 0.128        | -1.069        | 0.287        |
|                                | Shannon   | 0.053         | 0.087        | 0.607         | 0.544            | -0.075        | 0.188        | -0.399        | 0.691            | -0.153        | 0.141        | -1.082        | 0.281        |
|                                | Abundance | <b>0.276</b>  | <b>0.089</b> | <b>3.090</b>  | <b>0.002</b>     | <b>0.568</b>  | <b>0.193</b> | <b>2.940</b>  | <b>0.004</b>     | <b>-0.420</b> | <b>0.163</b> | <b>-2.576</b> | <b>0.011</b> |
| <b>Tree cover</b>              | Richness  | 0.184         | 0.100        | 1.837         | 0.067            | -0.352        | 0.211        | -1.669        | 0.097            | -0.122        | 0.162        | -0.753        | 0.453        |
|                                | Shannon   | 0.176         | 0.103        | 1.717         | 0.087            | -0.263        | 0.208        | -1.264        | 0.208            | 0.052         | 0.178        | 0.292         | 0.771        |
|                                | Abundance | <b>0.268</b>  | <b>0.105</b> | <b>2.546</b>  | <b>0.011</b>     | 0.303         | 0.215        | 1.410         | 0.160            | -0.187        | 0.206        | -0.907        | 0.366        |

(Continued from previous page)

| Predictor        | Diversity | Overall      |              |              |              | Forest        |              |               |                  | Grassland    |              |              |                  |
|------------------|-----------|--------------|--------------|--------------|--------------|---------------|--------------|---------------|------------------|--------------|--------------|--------------|------------------|
|                  |           | Coefficient  | se           | t-value      | p-value      | Coefficient   | se           | t-value       | p-value          | Coefficient  | se           | t-value      | p-value          |
| <b>Longitude</b> | Richness  | -0.058       | 0.043        | -1.337       | 0.182        | -0.064        | 0.053        | -1.210        | 0.228            | -0.215       | 0.162        | -1.324       | 0.188            |
|                  | Shannon   | -0.029       | 0.044        | -0.649       | 0.517        | -0.033        | 0.052        | -0.621        | 0.535            | -0.245       | 0.179        | -1.371       | 0.173            |
|                  | Abundance | 0.007        | 0.045        | 0.157        | 0.876        | 0.033         | 0.054        | 0.614         | 0.540            | -0.027       | 0.207        | -0.131       | 0.896            |
| <b>Latitude</b>  | Richness  | 0.023        | 0.051        | 0.448        | 0.655        | -0.031        | 0.069        | -0.447        | 0.655            | <b>0.370</b> | <b>0.099</b> | <b>3.724</b> | <b>&lt;0.001</b> |
|                  | Shannon   | 0.007        | 0.052        | 0.137        | 0.891        | -0.009        | 0.068        | -0.136        | 0.892            | <b>0.294</b> | <b>0.109</b> | <b>2.692</b> | <b>0.008</b>     |
|                  | Abundance | 0.002        | 0.054        | 0.046        | 0.964        | 0.027         | 0.070        | 0.379         | 0.705            | <b>0.267</b> | <b>0.127</b> | <b>2.109</b> | <b>0.037</b>     |
| <b>Elevation</b> | Richness  | 0.021        | 0.062        | 0.345        | 0.730        | -0.131        | 0.111        | -1.178        | 0.240            | 0.077        | 0.135        | 0.571        | 0.569            |
|                  | Shannon   | 0.030        | 0.063        | 0.483        | 0.630        | -0.106        | 0.110        | -0.961        | 0.338            | 0.020        | 0.149        | 0.132        | 0.895            |
|                  | Abundance | 0.086        | 0.065        | 1.323        | 0.187        | 0.141         | 0.113        | 1.245         | 0.215            | -0.128       | 0.172        | -0.741       | 0.460            |
| <b>MAT</b>       | Richness  | -0.077       | 0.059        | -1.296       | 0.196        | <b>-0.356</b> | <b>0.086</b> | <b>-4.129</b> | <b>&lt;0.001</b> | 0.425        | 0.263        | 1.613        | 0.109            |
|                  | Shannon   | -0.088       | 0.061        | -1.453       | 0.147        | <b>-0.310</b> | <b>0.085</b> | <b>-3.633</b> | <b>&lt;0.001</b> | 0.257        | 0.290        | 0.884        | 0.378            |
|                  | Abundance | -0.072       | 0.062        | -1.159       | 0.247        | -0.118        | 0.088        | -1.348        | 0.179            | 0.393        | 0.336        | 1.170        | 0.244            |
| <b>MAP</b>       | Richness  | -0.017       | 0.048        | -0.346       | 0.729        | <b>0.148</b>  | <b>0.075</b> | <b>1.983</b>  | <b>0.049</b>     | 0.086        | 0.129        | 0.664        | 0.508            |
|                  | Shannon   | -0.044       | 0.049        | -0.893       | 0.372        | 0.107         | 0.074        | 1.449         | 0.149            | 0.113        | 0.143        | 0.795        | 0.428            |
|                  | Abundance | 0.098        | 0.050        | 1.943        | 0.053        | <b>0.257</b>  | <b>0.076</b> | <b>3.381</b>  | <b>0.001</b>     | -0.125       | 0.165        | -0.758       | 0.450            |
| <b>Clay</b>      | Richness  | <b>0.108</b> | <b>0.047</b> | <b>2.312</b> | <b>0.021</b> | 0.088         | 0.061        | 1.444         | 0.150            | 0.123        | 0.099        | 1.249        | 0.214            |
|                  | Shannon   | <b>0.106</b> | <b>0.048</b> | <b>2.199</b> | <b>0.028</b> | 0.058         | 0.060        | 0.955         | 0.341            | 0.183        | 0.109        | 1.681        | 0.095            |
|                  | Abundance | 0.033        | 0.049        | 0.664        | 0.507        | 0.039         | 0.062        | 0.627         | 0.531            | -0.005       | 0.126        | -0.043       | 0.966            |
| <b>Silt</b>      | Richness  | -0.088       | 0.046        | -1.903       | 0.058        | -0.050        | 0.060        | -0.838        | 0.403            | -0.132       | 0.106        | -1.249       | 0.214            |
|                  | Shannon   | -0.092       | 0.047        | -1.951       | 0.052        | -0.039        | 0.059        | -0.664        | 0.507            | -0.179       | 0.116        | -1.542       | 0.126            |
|                  | Abundance | -0.087       | 0.049        | -1.797       | 0.073        | <b>-0.133</b> | <b>0.061</b> | <b>-2.192</b> | <b>0.030</b>     | 0.127        | 0.135        | 0.946        | 0.346            |

(Continued from previous page)

| Predictor        | Diversity | Overall       |              |               |              | Forest        |              |               |                  | Grassland     |              |               |              |
|------------------|-----------|---------------|--------------|---------------|--------------|---------------|--------------|---------------|------------------|---------------|--------------|---------------|--------------|
|                  |           | Coefficient   | se           | t-value       | p-value      | Coefficient   | se           | t-value       | p-value          | Coefficient   | se           | t-value       | p-value      |
| <b>pH</b>        | Richness  | 0.014         | 0.057        | 0.243         | 0.808        | 0.142         | 0.081        | 1.761         | 0.080            | -0.157        | 0.096        | -1.636        | 0.104        |
|                  | Shannon   | 0.018         | 0.058        | 0.313         | 0.755        | <b>0.201</b>  | <b>0.080</b> | <b>2.515</b>  | <b>0.013</b>     | -0.200        | 0.106        | -1.893        | 0.061        |
|                  | Abundance | 0.099         | 0.060        | 1.654         | 0.099        | <b>0.279</b>  | <b>0.082</b> | <b>3.402</b>  | <b>0.001</b>     | 0.110         | 0.122        | 0.900         | 0.370        |
| <b>Nitrogen</b>  | Richness  | <b>-0.093</b> | <b>0.041</b> | <b>-2.255</b> | <b>0.025</b> | <b>-0.181</b> | <b>0.061</b> | <b>-2.944</b> | <b>0.004</b>     | <b>-0.144</b> | <b>0.066</b> | <b>-2.185</b> | <b>0.031</b> |
|                  | Shannon   | <b>-0.103</b> | <b>0.042</b> | <b>-2.418</b> | <b>0.016</b> | <b>-0.168</b> | <b>0.061</b> | <b>-2.759</b> | <b>0.006</b>     | <b>-0.168</b> | <b>0.073</b> | <b>-2.317</b> | <b>0.022</b> |
|                  | Abundance | <b>-0.093</b> | <b>0.044</b> | <b>-2.139</b> | <b>0.033</b> | -0.092        | 0.063        | -1.470        | 0.143            | -0.140        | 0.084        | -1.673        | 0.097        |
| <b>C/N ratio</b> | Richness  | 0.026         | 0.044        | 0.580         | 0.562        | <b>0.223</b>  | <b>0.061</b> | <b>3.634</b>  | <b>&lt;0.001</b> | 0.021         | 0.085        | 0.249         | 0.803        |
|                  | Shannon   | 0.047         | 0.046        | 1.038         | 0.300        | <b>0.229</b>  | <b>0.061</b> | <b>3.772</b>  | <b>&lt;0.001</b> | 0.035         | 0.093        | 0.373         | 0.710        |
|                  | Abundance | 0.011         | 0.047        | 0.242         | 0.809        | 0.114         | 0.062        | 1.821         | 0.070            | -0.067        | 0.108        | -0.618        | 0.538        |

**Supplementary Table 2.** Responses of different pathogenic fungal genus to landscape complexity at the 500 m radius around the sampling plot. Shown are the coefficients (estimate slope), standard errors (se), t-value and *p*-value of the multivariate Generalized Additive Models for Location, Scale, and Shape (GAMLSS). Statistical tests are two-sided Wald tests from multivariate GAMLSS without multiple-comparison adjustment. Significance relationships are marked in bold.

| <b>Pathogenic group</b> | <b>Genus</b>               | <b>Diversity</b> | <b>Coefficient</b> | <b>se</b>    | <b>t-value</b> | <b>p-value</b>   |
|-------------------------|----------------------------|------------------|--------------------|--------------|----------------|------------------|
| LFSA fungi              | <i>Discosia</i>            | Richness         | <b>0.034</b>       | <b>0.010</b> | <b>3.285</b>   | <b>0.001</b>     |
|                         |                            | Shannon          | 0.014              | 0.011        | 1.310          | 0.191            |
|                         |                            | Abundance        | <b>0.042</b>       | <b>0.012</b> | <b>3.442</b>   | <b>&lt;0.001</b> |
|                         | <i>Neodevriesia</i>        | Richness         | <b>0.049</b>       | <b>0.016</b> | <b>3.032</b>   | <b>0.003</b>     |
|                         |                            | Shannon          | 0.032              | 0.016        | 1.965          | 0.051            |
|                         |                            | Abundance        | <b>0.054</b>       | <b>0.016</b> | <b>3.384</b>   | <b>&lt;0.001</b> |
|                         | <i>Parafabraea</i>         | Richness         | -0.025             | 0.016        | -1.537         | 0.125            |
|                         |                            | Shannon          | -0.031             | 0.017        | -1.813         | 0.071            |
|                         |                            | Abundance        | -0.010             | 0.017        | -0.575         | 0.566            |
|                         | <i>Pseudofabraea</i>       | Richness         | 0.018              | 0.014        | 1.269          | 0.205            |
|                         |                            | Shannon          | 0.020              | 0.014        | 1.440          | 0.150            |
|                         |                            | Abundance        | 0.009              | 0.015        | 0.584          | 0.560            |
|                         | <i>Pseudophaeomoniella</i> | Richness         | 0.009              | 0.016        | 0.544          | 0.586            |
|                         |                            | Shannon          | <0.001             | <0.001       | 0.227          | 0.810            |
|                         |                            | Abundance        | -0.001             | 0.015        | -0.078         | 0.938            |
| RA fungi                | <i>Entoloma</i>            | Richness         | 0.008              | 0.016        | 0.534          | 0.594            |
|                         |                            | Shannon          | <b>0.037</b>       | <b>0.016</b> | <b>2.284</b>   | <b>0.023</b>     |
|                         |                            | Abundance        | 0.023              | 0.016        | 1.427          | 0.154            |
|                         | <i>Exophiala</i>           | Richness         | -0.012             | 0.013        | -0.909         | 0.364            |
|                         |                            | Shannon          | 0.019              | 0.016        | 1.179          | 0.239            |
|                         |                            | Abundance        | 0.022              | 0.014        | 1.542          | 0.124            |
|                         | <i>Hygrocybe</i>           | Richness         | -0.009             | 0.016        | -0.527         | 0.599            |
|                         |                            | Shannon          | -0.005             | 0.017        | -0.296         | 0.767            |
|                         |                            | Abundance        | -0.004             | 0.017        | -0.221         | 0.826            |
|                         | <i>Oidiodendron</i>        | Richness         | 0.004              | 0.014        | 0.285          | 0.776            |
|                         |                            | Shannon          | 0.010              | 0.015        | 0.643          | 0.521            |
|                         |                            | Abundance        | 0.005              | 0.015        | 0.306          | 0.759            |

**Supplementary Table 3.** The correlation of the leaf/fruit/seed-associated (LFSA) and root-associated (RA) fungal alpha diversity and eight landscape metrics at the 500 m radius around the sampling plot. The diversity indices include richness, Shannon diversity and the relative abundance of the fungi. The eight landscape metrics include landscape division index (Division), edge density (ED), patch density (PD), largest patch index (LPI), landscape shape index (LSI), patch richness (PR), modified Simpson diversity index (MSIDI), and Shannon diversity index (SHDI). Statistical significance is determined using two-sided Spearman's rank correlation tests without multiple-comparison adjustment. Shown are the correlation  $r$ -value and significance  $p$ -value, and significant relationships are marked in bold.

|                             | metrics  | Overall       |                  | Forest        |              | Grassland     |                  |
|-----------------------------|----------|---------------|------------------|---------------|--------------|---------------|------------------|
|                             |          | $r$ -value    | $p$ -value       | $r$ -value    | $p$ -value   | $r$ -value    | $p$ -value       |
| <b>Richness LFSA fungi</b>  | Division | <b>0.156</b>  | <b>&lt;0.001</b> | <b>0.134</b>  | <b>0.030</b> | <b>0.265</b>  | <b>&lt;0.001</b> |
|                             | ED       | <b>0.197</b>  | <b>&lt;0.001</b> | <b>0.194</b>  | <b>0.002</b> | <b>0.307</b>  | <b>&lt;0.001</b> |
|                             | PD       | <b>0.226</b>  | <b>&lt;0.001</b> | <b>0.181</b>  | <b>0.003</b> | <b>0.352</b>  | <b>&lt;0.001</b> |
|                             | LPI      | <b>-0.137</b> | <b>&lt;0.001</b> | <b>-0.130</b> | <b>0.034</b> | <b>-0.245</b> | <b>0.001</b>     |
|                             | LSI      | <b>0.197</b>  | <b>&lt;0.001</b> | <b>0.191</b>  | <b>0.002</b> | <b>0.312</b>  | <b>&lt;0.001</b> |
|                             | PR       | <b>0.227</b>  | <b>&lt;0.001</b> | 0.119         | 0.053        | <b>0.324</b>  | <b>&lt;0.001</b> |
|                             | MSIDI    | <b>0.176</b>  | <b>&lt;0.001</b> | <b>0.154</b>  | <b>0.012</b> | <b>0.242</b>  | <b>0.001</b>     |
|                             | SHDI     | <b>0.201</b>  | <b>&lt;0.001</b> | <b>0.156</b>  | <b>0.011</b> | <b>0.274</b>  | <b>&lt;0.001</b> |
| <b>Richness RA fungi</b>    | Division | <b>0.093</b>  | <b>0.036</b>     | 0.057         | 0.353        | 0.112         | 0.131            |
|                             | ED       | 0.081         | 0.068            | 0.056         | 0.362        | 0.084         | 0.258            |
|                             | PD       | <b>0.106</b>  | <b>0.016</b>     | 0.073         | 0.236        | 0.107         | 0.150            |
|                             | LPI      | <b>-0.091</b> | <b>0.041</b>     | -0.060        | 0.330        | -0.107        | 0.150            |
|                             | LSI      | 0.080         | 0.071            | 0.062         | 0.314        | 0.080         | 0.283            |
|                             | PR       | <b>0.144</b>  | <b>0.001</b>     | 0.099         | 0.110        | 0.105         | 0.156            |
|                             | MSIDI    | <b>0.100</b>  | <b>0.024</b>     | 0.053         | 0.395        | 0.107         | 0.148            |
|                             | SHDI     | <b>0.114</b>  | <b>0.010</b>     | 0.071         | 0.250        | 0.104         | 0.162            |
| <b>Shannon LFSA fungi</b>   | Division | <b>0.159</b>  | <b>&lt;0.001</b> | <b>0.151</b>  | <b>0.014</b> | <b>0.257</b>  | <b>&lt;0.001</b> |
|                             | ED       | <b>0.187</b>  | <b>&lt;0.001</b> | <b>0.195</b>  | <b>0.001</b> | <b>0.303</b>  | <b>&lt;0.001</b> |
|                             | PD       | <b>0.224</b>  | <b>&lt;0.001</b> | <b>0.194</b>  | <b>0.002</b> | <b>0.354</b>  | <b>&lt;0.001</b> |
|                             | LPI      | <b>-0.141</b> | <b>0.001</b>     | <b>-0.143</b> | <b>0.020</b> | <b>-0.241</b> | <b>0.001</b>     |
|                             | LSI      | <b>0.188</b>  | <b>&lt;0.001</b> | <b>0.193</b>  | <b>0.002</b> | <b>0.305</b>  | <b>&lt;0.001</b> |
|                             | PR       | <b>0.235</b>  | <b>&lt;0.001</b> | <b>0.124</b>  | <b>0.044</b> | <b>0.345</b>  | <b>&lt;0.001</b> |
|                             | MSIDI    | <b>0.176</b>  | <b>&lt;0.001</b> | <b>0.160</b>  | <b>0.009</b> | <b>0.238</b>  | <b>0.001</b>     |
|                             | SHDI     | <b>0.205</b>  | <b>&lt;0.001</b> | <b>0.168</b>  | <b>0.006</b> | <b>0.269</b>  | <b>&lt;0.001</b> |
| <b>Shannon RA fungi</b>     | Division | <b>0.091</b>  | <b>0.039</b>     | 0.064         | 0.302        | 0.083         | 0.263            |
|                             | ED       | 0.074         | 0.095            | 0.051         | 0.413        | 0.051         | 0.493            |
|                             | PD       | <b>0.096</b>  | <b>0.030</b>     | 0.082         | 0.183        | 0.062         | 0.403            |
|                             | LPI      | <b>-0.091</b> | <b>0.040</b>     | -0.064        | 0.300        | -0.080        | 0.283            |
|                             | LSI      | 0.072         | 0.103            | 0.055         | 0.377        | 0.047         | 0.527            |
|                             | PR       | <b>0.126</b>  | <b>0.004</b>     | 0.105         | 0.090        | 0.066         | 0.373            |
|                             | MSIDI    | <b>0.092</b>  | <b>0.038</b>     | 0.054         | 0.383        | 0.080         | 0.284            |
|                             | SHDI     | <b>0.100</b>  | <b>0.023</b>     | 0.073         | 0.238        | 0.069         | 0.353            |
| <b>Abundance LFSA fungi</b> | Division | <b>0.135</b>  | <b>0.002</b>     | 0.069         | 0.265        | <b>0.264</b>  | <b>&lt;0.001</b> |
|                             | ED       | <b>0.182</b>  | <b>&lt;0.001</b> | <b>0.138</b>  | <b>0.025</b> | <b>0.297</b>  | <b>&lt;0.001</b> |
|                             | PD       | <b>0.195</b>  | <b>&lt;0.001</b> | 0.117         | 0.057        | <b>0.314</b>  | <b>&lt;0.001</b> |
|                             | LPI      | <b>-0.121</b> | <b>0.006</b>     | -0.067        | 0.281        | <b>-0.247</b> | <b>0.001</b>     |
|                             | LSI      | <b>0.182</b>  | <b>&lt;0.001</b> | <b>0.133</b>  | <b>0.031</b> | <b>0.304</b>  | <b>&lt;0.001</b> |
|                             | PR       | <b>0.168</b>  | <b>&lt;0.001</b> | 0.035         | 0.566        | <b>0.276</b>  | <b>&lt;0.001</b> |
|                             | MSIDI    | <b>0.147</b>  | <b>0.001</b>     | 0.081         | 0.188        | <b>0.242</b>  | <b>0.001</b>     |
|                             | SHDI     | <b>0.160</b>  | <b>&lt;0.001</b> | 0.074         | 0.229        | <b>0.261</b>  | <b>&lt;0.001</b> |
| <b>Abundance RA fungi</b>   | Division | <b>0.094</b>  | <b>0.033</b>     | 0.050         | 0.419        | <b>0.150</b>  | <b>0.043</b>     |
|                             | ED       | <b>0.091</b>  | <b>0.040</b>     | 0.061         | 0.323        | 0.126         | 0.090            |
|                             | PD       | <b>0.119</b>  | <b>0.007</b>     | 0.078         | 0.209        | 0.142         | 0.056            |
|                             | LPI      | <b>-0.090</b> | <b>0.042</b>     | -0.051        | 0.408        | <b>-0.147</b> | <b>0.047</b>     |
|                             | LSI      | <b>0.094</b>  | <b>0.034</b>     | 0.070         | 0.256        | 0.128         | 0.084            |
|                             | PR       | <b>0.163</b>  | <b>&lt;0.001</b> | 0.101         | 0.102        | <b>0.154</b>  | <b>0.038</b>     |
|                             | MSIDI    | <b>0.106</b>  | <b>0.017</b>     | 0.044         | 0.478        | <b>0.153</b>  | <b>0.039</b>     |
|                             | SHDI     | <b>0.124</b>  | <b>0.005</b>     | 0.066         | 0.288        | <b>0.149</b>  | <b>0.044</b>     |

**Supplementary Table 4.** Generalized dissimilarity modeling (GDM) results for LFSA (a) and RA (b) fungal Sørensen beta dissimilarity for all plots. The table shows the sum of coefficients (SC; cumulative sum of the three I-spline coefficients per predictor) and the relative contribution (RC, %) of each predictor. Predictors include landscape complexity, grass cover, crop cover, tree cover, mean annual temperature (MAT), mean annual precipitation (MAP), spatial distance, elevation, clay content, silt content, soil pH, nitrogen content, and C/N ratio. Landscape complexity, grass cover, crop cover, and tree cover are calculated within buffer radii ranging from 250 m to 10,000 m as competing models.

|                       | 250 m  |      | 500 m  |      | 1000 m |       | 2000 m |      | 5000 m |       | 10000 m |       |
|-----------------------|--------|------|--------|------|--------|-------|--------|------|--------|-------|---------|-------|
|                       | SC     | RC   | SC     | RC   | SC     | RC    | SC     | RC   | SC     | RC    | SC      | RC    |
| <b>(a) LFSA fungi</b> |        |      |        |      |        |       |        |      |        |       |         |       |
| Landscape complexity  | 0.003  | 0.02 | 0.095  | 0.81 | 0.097  | 0.84  | 0.046  | 0.39 | 0.000  | 0.00  | 0.000   | 0.00  |
| Grass cover           | 0.760  | 6.39 | 0.762  | 6.46 | 0.716  | 6.13  | 0.813  | 6.77 | 0.555  | 4.56  | 0.638   | 5.15  |
| Crop cover            | 0.411  | 3.50 | 0.371  | 3.19 | 0.314  | 2.72  | 0.238  | 2.01 | 0.275  | 2.29  | 0.232   | 1.90  |
| Tree cover            | 0.617  | 5.21 | 0.618  | 5.25 | 0.523  | 4.49  | 0.558  | 4.65 | 0.651  | 5.34  | 0.669   | 5.38  |
| MAT                   | 3.538  | 29.8 | 3.462  | 29.4 | 3.450  | 29.58 | 3.646  | 30.5 | 3.958  | 32.64 | 4.045   | 32.69 |
| MAP                   | 0.229  | 1.95 | 0.192  | 1.65 | 0.161  | 1.39  | 0.167  | 1.40 | 0.134  | 1.11  | 0.142   | 1.16  |
| Spatial distance      | 1.027  | 8.75 | 0.995  | 8.55 | 1.008  | 8.74  | 1.019  | 8.6  | 0.997  | 8.29  | 0.967   | 7.89  |
| Elevation             | 0.000  | 0.00 | 0.000  | 0.00 | 0.000  | 0.00  | 0.016  | 0.14 | 0.062  | 0.51  | 0.050   | 0.41  |
| Clay                  | 0.493  | 4.20 | 0.483  | 4.15 | 0.488  | 4.23  | 0.506  | 4.27 | 0.506  | 4.21  | 0.490   | 4.00  |
| Silt                  | 0.067  | 0.56 | 0.065  | 0.56 | 0.118  | 1.01  | 0.161  | 1.34 | 0.145  | 1.18  | 0.190   | 1.53  |
| pH                    | 2.879  | 24.5 | 2.840  | 24.4 | 2.933  | 25.42 | 2.968  | 25.0 | 3.002  | 24.97 | 3.048   | 24.86 |
| Nitrogen              | 0.593  | 5.04 | 0.574  | 4.92 | 0.544  | 4.7   | 0.519  | 4.36 | 0.558  | 4.62  | 0.610   | 4.95  |
| C/N ratio             | 1.175  | 10.0 | 1.237  | 10.6 | 1.240  | 10.75 | 1.257  | 10.6 | 1.234  | 10.27 | 1.238   | 10.09 |
| <b>(b) RA fungi</b>   |        |      |        |      |        |       |        |      |        |       |         |       |
| Landscape complexity  | 0.059  | 0.18 | 0.000  | 0.00 | 0.021  | 0.06  | 0.000  | 0    | 0.255  | 0.75  | 0.175   | 0.49  |
| Grass cover           | 0.700  | 2.17 | 0.805  | 2.52 | 1.588  | 4.85  | 1.988  | 5.84 | 1.872  | 5.60  | 1.974   | 5.67  |
| Crop cover            | 0.067  | 0.21 | 0.304  | 0.96 | 0.067  | 0.21  | 0.063  | 0.19 | 0.000  | 0.00  | 0.000   | 0.00  |
| Tree cover            | 1.850  | 5.72 | 1.681  | 5.22 | 1.695  | 5.15  | 1.920  | 5.6  | 3.686  | 10.96 | 3.425   | 9.78  |
| MAT                   | 7.582  | 23.7 | 7.161  | 22.5 | 6.997  | 21.51 | 7.136  | 21.1 | 7.243  | 21.82 | 7.751   | 22.43 |
| MAP                   | 3.556  | 11.0 | 3.689  | 11.5 | 3.794  | 11.58 | 4.036  | 11.9 | 2.691  | 8.05  | 2.784   | 7.99  |
| Spatial distance      | 0.790  | 2.46 | 0.447  | 1.40 | 0.168  | 0.51  | 0.000  | 0.00 | 0.000  | 0.00  | 0.000   | 0.00  |
| Elevation             | 3.846  | 11.9 | 3.657  | 11.4 | 3.520  | 10.75 | 3.422  | 10.1 | 3.366  | 10.07 | 3.235   | 9.30  |
| Clay                  | 0.901  | 2.79 | 1.164  | 3.63 | 1.452  | 4.42  | 1.754  | 5.14 | 1.652  | 4.93  | 1.878   | 5.38  |
| Silt                  | 0.494  | 1.52 | 0.651  | 2.02 | 0.623  | 1.89  | 0.802  | 2.34 | 0.630  | 1.87  | 0.995   | 2.84  |
| pH                    | 11.202 | 35.2 | 11.215 | 35.5 | 11.57  | 35.74 | 11.66  | 34.7 | 10.951 | 33.15 | 11.435  | 33.23 |
| Nitrogen              | 0.253  | 0.79 | 0.283  | 0.89 | 0.281  | 0.86  | 0.240  | 0.71 | 0.118  | 0.36  | 0.235   | 0.68  |
| C/N ratio             | 0.733  | 2.30 | 0.758  | 2.40 | 0.800  | 2.47  | 0.837  | 2.49 | 0.803  | 2.43  | 0.760   | 2.21  |

**Supplementary Table 5.** Generalized dissimilarity modeling (GDM) results for LFSA (a) and RA (b) fungal Sørensen beta dissimilarity for forest ecosystems. The table shows the sum of coefficients (SC; cumulative sum of the three I-spline coefficients per predictor) and the relative contribution (RC, %) of each predictor. Predictors include landscape complexity, grass cover, crop cover, tree cover, mean annual temperature (MAT), mean annual precipitation (MAP), spatial distance, elevation, clay content, silt content, soil pH, nitrogen content, and C/N ratio. Landscape complexity, grass cover, crop cover, and tree cover are calculated within buffer radii ranging from 250 m to 10,000 m as competing models.

|                       | 250 m |       | 500 m |       | 1000 m |       | 2000 m |       | 5000 m |       | 10000 m |       |
|-----------------------|-------|-------|-------|-------|--------|-------|--------|-------|--------|-------|---------|-------|
|                       | SC    | RC    | SC    | RC    | SC     | RC    | SC     | RC    | SC     | RC    | SC      | RC    |
| <b>(a) LFSA fungi</b> |       |       |       |       |        |       |        |       |        |       |         |       |
| Landscape complexity  | 0.156 | 1.67  | 0.414 | 4.39  | 0.423  | 4.47  | 0.470  | 4.96  | 0.048  | 0.53  | 0.078   | 0.85  |
| Grass cover           | 0.000 | 0.00  | 0.000 | 0.00  | 0.000  | 0.00  | 0.000  | 0.00  | 0.000  | 0.00  | 0.000   | 0.00  |
| Crop cover            | 0.118 | 1.26  | 0.000 | 0.00  | 0.000  | 0.00  | 0.000  | 0.00  | 0.000  | 0.00  | 0.000   | 0.00  |
| Tree cover            | 0.331 | 3.56  | 0.221 | 2.34  | 0.080  | 0.85  | 0.000  | 0.00  | 0.047  | 0.50  | 0.233   | 2.47  |
| MAT                   | 3.398 | 36.05 | 3.556 | 37.2  | 3.632  | 37.91 | 3.603  | 37.56 | 3.515  | 38.46 | 3.625   | 38.83 |
| MAP                   | 0.000 | 0.00  | 0.000 | 0.00  | 0.000  | 0.00  | 0.000  | 0.00  | 0.000  | 0.00  | 0.000   | 0.00  |
| Spatial distance      | 1.510 | 16.22 | 1.430 | 15.15 | 1.473  | 15.57 | 1.493  | 15.76 | 1.608  | 17.82 | 1.493   | 16.2  |
| Elevation             | 0.186 | 2.00  | 0.217 | 2.3   | 0.236  | 2.49  | 0.276  | 2.90  | 0.201  | 2.22  | 0.206   | 2.23  |
| Clay                  | 0.000 | 0.00  | 0.000 | 0.00  | 0.000  | 0.00  | 0.000  | 0.00  | 0.000  | 0.00  | 0.000   | 0.00  |
| Silt                  | 0.446 | 4.79  | 0.456 | 4.83  | 0.474  | 5.01  | 0.477  | 5.03  | 0.469  | 5.20  | 0.485   | 5.26  |
| pH                    | 1.889 | 20.29 | 1.792 | 18.98 | 1.838  | 19.42 | 1.867  | 19.7  | 1.900  | 21.06 | 1.896   | 20.56 |
| Nitrogen              | 0.572 | 6.15  | 0.594 | 6.29  | 0.567  | 6     | 0.543  | 5.73  | 0.557  | 6.17  | 0.545   | 5.91  |
| C/N ratio             | 0.750 | 7.99  | 0.810 | 8.52  | 0.789  | 8.27  | 0.796  | 8.34  | 0.730  | 8.04  | 0.713   | 7.68  |
| <b>(b) RA fungi</b>   |       |       |       |       |        |       |        |       |        |       |         |       |
| Landscape complexity  | 0.272 | 1.68  | 0.000 | 0.00  | 0.000  | 0.00  | 0.000  | 0.00  | 0.510  | 2.97  | 1.404   | 8.01  |
| Grass cover           | 0.120 | 0.75  | 0.000 | 0.00  | 0.000  | 0.00  | 0.000  | 0.00  | 0.000  | 0.00  | 0.000   | 0.00  |
| Crop cover            | 0.068 | 0.43  | 0.716 | 4.22  | 0.367  | 2.22  | 0.279  | 1.7   | 0.234  | 1.37  | 0.161   | 0.92  |
| Tree cover            | 0.704 | 4.29  | 0.773 | 4.49  | 0.643  | 3.86  | 0.706  | 4.27  | 1.364  | 8.03  | 1.196   | 6.93  |
| MAT                   | 5.769 | 35.82 | 5.901 | 34.97 | 5.881  | 35.76 | 5.932  | 36.19 | 6.041  | 35.61 | 5.955   | 34.37 |
| MAP                   | 0.989 | 6.17  | 1.022 | 6.08  | 1.050  | 6.41  | 0.997  | 6.11  | 0.698  | 4.13  | 0.549   | 3.19  |
| Spatial distance      | 0.157 | 0.97  | 0.196 | 1.16  | 0.206  | 1.25  | 0.197  | 1.19  | 0.221  | 1.3   | 0.328   | 1.89  |
| Elevation             | 1.059 | 6.55  | 1.074 | 6.34  | 0.985  | 5.97  | 0.945  | 5.74  | 0.862  | 5.07  | 0.877   | 5.05  |
| Clay                  | 0.276 | 1.7   | 0.361 | 2.12  | 0.326  | 1.96  | 0.280  | 1.69  | 0.236  | 1.38  | 0.180   | 1.03  |
| Silt                  | 1.206 | 7.42  | 1.186 | 6.96  | 1.227  | 7.39  | 1.228  | 7.42  | 1.099  | 6.43  | 1.050   | 6.02  |
| pH                    | 2.734 | 17.05 | 2.851 | 16.96 | 2.884  | 17.61 | 2.867  | 17.57 | 2.821  | 16.71 | 2.667   | 15.48 |
| Nitrogen              | 2.202 | 13.58 | 2.277 | 13.4  | 2.334  | 14.09 | 2.352  | 14.25 | 2.251  | 13.19 | 2.159   | 12.39 |
| C/N ratio             | 0.577 | 3.60  | 0.555 | 3.30  | 0.572  | 3.49  | 0.631  | 3.87  | 0.643  | 3.81  | 0.815   | 4.73  |

**Supplementary Table 6.** Generalized dissimilarity modeling (GDM) results for LFSA (a) and RA (b) fungal Sørensen beta dissimilarity for grassland ecosystem. The table shows the sum of coefficients (SC; cumulative sum of the three I-spline coefficients per predictor) and the relative contribution (RC, %) of each predictor. Predictors include landscape complexity, grass cover, crop cover, tree cover, mean annual temperature (MAT), mean annual precipitation (MAP), spatial distance, elevation, clay content, silt content, soil pH, nitrogen content, and C/N ratio. Landscape complexity, grass cover, crop cover, and tree cover are calculated within buffer radii ranging from 250 m to 10,000 m as competing models.

|                       | 250 m  |       | 500 m  |       | 1000 m |       | 2000 m |       | 5000 m |       | 10000 m |       |
|-----------------------|--------|-------|--------|-------|--------|-------|--------|-------|--------|-------|---------|-------|
|                       | SC     | RC    | SC      | RC    |
| <b>(a) LFSA fungi</b> |        |       |        |       |        |       |        |       |        |       |         |       |
| Landscape complexity  | 0.000  | 0.00  | 0.081  | 0.83  | 0.169  | 1.76  | 0.220  | 2.30  | 0.134  | 1.45  | 0.080   | 0.87  |
| Grass cover           | 0.122  | 1.32  | 0.000  | 0.00  | 0.000  | 0.00  | 0.000  | 0.00  | 0.000  | 0.00  | 0.000   | 0.00  |
| Crop cover            | 0.318  | 3.48  | 0.241  | 2.54  | 0.224  | 2.36  | 0.261  | 2.78  | 0.463  | 5.10  | 0.516   | 5.62  |
| Tree cover            | 0.176  | 1.92  | 0.080  | 0.84  | 0.036  | 0.38  | 0.005  | 0.05  | 0.000  | 0.00  | 0.000   | 0.00  |
| MAT                   | 1.491  | 16.2  | 1.628  | 17.06 | 1.621  | 16.97 | 1.576  | 16.66 | 1.460  | 15.99 | 1.604   | 17.36 |
| MAP                   | 0.082  | 0.90  | 0.125  | 1.31  | 0.109  | 1.14  | 0.119  | 1.26  | 0.168  | 1.84  | 0.164   | 1.78  |
| Spatial distance      | 1.075  | 11.76 | 1.185  | 12.5  | 1.188  | 12.51 | 1.175  | 12.5  | 1.054  | 11.6  | 1.034   | 11.27 |
| Elevation             | 0.332  | 3.63  | 0.453  | 4.78  | 0.463  | 4.87  | 0.416  | 4.43  | 0.265  | 2.91  | 0.195   | 2.13  |
| Clay                  | 0.195  | 2.13  | 0.170  | 1.80  | 0.177  | 1.87  | 0.169  | 1.8   | 0.114  | 1.26  | 0.113   | 1.23  |
| Silt                  | 0.398  | 4.24  | 0.439  | 4.50  | 0.441  | 4.52  | 0.434  | 4.49  | 0.424  | 4.54  | 0.397   | 4.21  |
| pH                    | 2.480  | 27.1  | 2.512  | 26.44 | 2.485  | 26.13 | 2.475  | 26.26 | 2.455  | 26.97 | 2.509   | 27.31 |
| Nitrogen              | 0.530  | 5.79  | 0.548  | 5.76  | 0.547  | 5.75  | 0.534  | 5.67  | 0.529  | 5.82  | 0.546   | 5.94  |
| C/N ratio             | 1.978  | 21.53 | 2.062  | 21.63 | 2.073  | 21.72 | 2.064  | 21.82 | 2.059  | 22.54 | 2.054   | 22.27 |
| <b>(b) RA fungi</b>   |        |       |        |       |        |       |        |       |        |       |         |       |
| Landscape complexity  | 0.000  | 0.00  | 0.000  | 0.00  | 0.000  | 0.00  | 0.000  | 0.00  | 0.000  | 0.00  | 0.000   | 0.00  |
| Grass cover           | 0.000  | 0.00  | 0.000  | 0.00  | 0.000  | 0.00  | 0.000  | 0.00  | 0.000  | 0.00  | 0.000   | 0.00  |
| Crop cover            | 0.000  | 0.00  | 0.000  | 0.0   | 0.000  | 0.00  | 0.000  | 0.00  | 0.000  | 0.00  | 0.000   | 0.00  |
| Tree cover            | 0.057  | 0.13  | 0.090  | 0.20  | 0.113  | 0.25  | 0.134  | 0.30  | 0.151  | 0.36  | 0.181   | 0.42  |
| MAT                   | 3.969  | 8.90  | 3.976  | 9.00  | 3.995  | 9.13  | 4.030  | 9.20  | 4.053  | 9.87  | 4.013   | 9.51  |
| MAP                   | 0.000  | 0.00  | 0.000  | 0.00  | 0.000  | 0.00  | 0.000  | 0.00  | 0.000  | 0.00  | 0.000   | 0.00  |
| Spatial distance      | 32.382 | 71.88 | 31.930 | 71.54 | 31.513 | 71.26 | 31.441 | 71.1  | 28.742 | 69.31 | 29.872  | 70.11 |
| Elevation             | 4.163  | 9.23  | 4.151  | 9.29  | 4.135  | 9.34  | 4.137  | 9.34  | 4.142  | 9.97  | 4.107   | 9.63  |
| Clay                  | 0.000  | 0.00  | 0.000  | 0.00  | 0.000  | 0.00  | 0.000  | 0.00  | 0.000  | 0.00  | 0.000   | 0.00  |
| Silt                  | 0.657  | 1.43  | 0.663  | 1.46  | 0.663  | 1.47  | 0.662  | 1.47  | 0.648  | 1.53  | 0.651   | 1.50  |
| pH                    | 2.949  | 6.61  | 2.945  | 6.66  | 2.940  | 6.71  | 2.945  | 6.72  | 2.863  | 6.97  | 2.908   | 6.89  |
| Nitrogen              | 0.171  | 0.38  | 0.175  | 0.39  | 0.179  | 0.4   | 0.173  | 0.39  | 0.162  | 0.39  | 0.169   | 0.4   |
| C/N ratio             | 0.656  | 1.45  | 0.651  | 1.45  | 0.635  | 1.43  | 0.649  | 1.46  | 0.664  | 1.6   | 0.662   | 1.55  |

**Supplementary Table 7.** Metrics used at landscape level to quantify landscape complexity.

| <b>Metrics (units)</b> | <b>Name</b>                             | <b>Description</b>                                                                                                                                                                                                     | <b>Type</b>          |
|------------------------|-----------------------------------------|------------------------------------------------------------------------------------------------------------------------------------------------------------------------------------------------------------------------|----------------------|
| Division               | Landscape division index                | The metric quantifies the probability that two randomly selected points in a landscape are not in the same patch. Higher value means the landscape is divided into many small patches, reducing connectivity.          | Aggregation metric   |
| ED                     | Edge density (meters per hectare)       | The total lengths of all edge segments in relation to the total landscape area. The metric describes the configuration heterogeneity of the landscape and increases as the landscape edge gets more complex.           | Area and edge metric |
| PD                     | Patch density (number per 100 hectares) | Ratio of number of patches and the total landscape area. The metric describes the configuration heterogeneity of the landscape and increases as the patch configuration gets more complex.                             | Aggregation metric   |
| LPI                    | Largest patch index (%)                 | Ratio of the landscape area covered by the largest patch in the landscape. The metric measures dominance and spatial continuity of the largest habitat patch and increases as the largest patch is larger.             | Area and edge metric |
| LSI                    | Landscape shape index                   | Ratio of the actual landscape edge length and the hypothetical minimum landscape edge length. The higher the LSI value, the more complex the landscape shape.                                                          | Aggregation metric   |
| PR                     | Patch richness                          | The metric measures the number of unique patch types (land cover classes) present in a landscape and is the simplest measure of compositional heterogeneity. Higher value means more diverse land cover types present. | Diversity metric     |
| MSIDI                  | Modified Simpson diversity index        | The metric measures landscape diversity and the value increases as the number of patches increases and landscape proportions are more equally distributed.                                                             | Diversity metric     |
| SHDI                   | Shannon diversity index                 | The metric describes diversity of landscape, which considers both the number and abundance of each class. The value increases as the number of classes increases while the proportions are equally distributed.        | Diversity metric     |

**Supplementary Table 8.** The correlation of the landscape complexity and the corresponding eight landscape metrics across six spatial scales. The landscape complexity variables (i.e. landscape complexity 250, 500, 1,000, 2,000, 5,000 and 10,000) correspond to the minus of the first PCA axis of the eight landscape metrics at their respective spatial scales. The eight landscape metrics include landscape division index (Division), edge density (ED), patch density (PD), largest patch index (LPI), landscape shape index (LSI), patch richness (PR), modified Simpson diversity index (MSIDI), and Shannon diversity index (SHDI). Statistical significance is determined using two-sided Spearman's correlation tests without adjustment for multiple comparisons. Shown are *r*-values and significance levels (*p*-values) of correlations.

|                 | Landscape complexity 250 |          | Landscape complexity 500 |          | Landscape complexity1000 |          | Landscape complexity2000 |          | Landscape complexity 5000 |          | Landscape complexity 10000 |          |
|-----------------|--------------------------|----------|--------------------------|----------|--------------------------|----------|--------------------------|----------|---------------------------|----------|----------------------------|----------|
|                 | <i>r</i>                 | <i>p</i> | <i>r</i>                 | <i>p</i> | <i>r</i>                 | <i>p</i> | <i>r</i>                 | <i>p</i> | <i>r</i>                  | <i>p</i> | <i>r</i>                   | <i>p</i> |
| <b>Division</b> | 0.980                    | <0.001   | 0.979                    | <0.001   | 0.976                    | <0.001   | 0.973                    | <0.001   | 0.963                     | <0.001   | 0.960                      | <0.001   |
| <b>ED</b>       | 0.975                    | <0.001   | 0.981                    | <0.001   | 0.975                    | <0.001   | 0.962                    | <0.001   | 0.952                     | <0.001   | 0.942                      | <0.001   |
| <b>PD</b>       | 0.966                    | <0.001   | 0.947                    | <0.001   | 0.930                    | <0.001   | 0.896                    | <0.001   | 0.867                     | <0.001   | 0.857                      | <0.001   |
| <b>LPI</b>      | -0.966                   | <0.001   | -0.960                   | <0.001   | -0.955                   | <0.001   | -0.953                   | <0.001   | -0.932                    | <0.001   | -0.939                     | <0.001   |
| <b>LSI</b>      | 0.975                    | <0.001   | 0.981                    | <0.001   | 0.975                    | <0.001   | 0.962                    | <0.001   | 0.952                     | <0.001   | 0.942                      | <0.001   |
| <b>PR</b>       | 0.936                    | <0.001   | 0.875                    | <0.001   | 0.767                    | <0.001   | 0.617                    | <0.001   | 0.288                     | <0.001   | -0.056                     | 0.207    |
| <b>MSIDI</b>    | 0.982                    | <0.001   | 0.985                    | <0.001   | 0.893                    | <0.001   | 0.924                    | <0.001   | 0.940                     | <0.001   | 0.928                      | <0.001   |
| <b>SHDI</b>     | 0.980                    | <0.001   | 0.980                    | <0.001   | 0.981                    | <0.001   | 0.970                    | <0.001   | 0.946                     | <0.001   | 0.903                      | <0.001   |

**Supplementary Table 9.** Spatial autocorrelation of predicted soil pathogenic fungal alpha diversity based on multivariate Generalized Additive Models for Location, Scale, and Shape (GAMLSS). Moran's I values and corresponding *p*-values are reported for the richness, Shannon diversity, and relative abundance of LFSA and RA fungi, derived from six competing models evaluated at six different landscape spatial scales (250 m to 10,000 m radii). Statistical tests were two-sided.

| Diversity indices       | Scale | Moran's I | <i>p</i> -value |
|-------------------------|-------|-----------|-----------------|
| Richness of LFSA fungi  | 250   | 0.011     | 0.093           |
| Richness of LFSA fungi  | 500   | 0.011     | 0.093           |
| Richness of LFSA fungi  | 1000  | 0.021     | 0.011           |
| Richness of LFSA fungi  | 2000  | 0.008     | 0.152           |
| Richness of LFSA fungi  | 5000  | 0.004     | 0.261           |
| Richness of LFSA fungi  | 10000 | 0.004     | 0.280           |
| Shannon of LFSA fungi   | 250   | 0.003     | 0.291           |
| Shannon of LFSA fungi   | 500   | 0.000     | 0.401           |
| Shannon of LFSA fungi   | 1000  | 0.006     | 0.206           |
| Shannon of LFSA fungi   | 2000  | -0.003    | 0.544           |
| Shannon of LFSA fungi   | 5000  | 0.000     | 0.415           |
| Shannon of LFSA fungi   | 10000 | 0.000     | 0.424           |
| Abundance of LFSA fungi | 250   | 0.011     | 0.093           |
| Abundance of LFSA fungi | 500   | 0.013     | 0.063           |
| Abundance of LFSA fungi | 1000  | 0.020     | 0.012           |
| Abundance of LFSA fungi | 2000  | 0.016     | 0.033           |
| Abundance of LFSA fungi | 5000  | 0.013     | 0.061           |
| Abundance of LFSA fungi | 10000 | 0.014     | 0.048           |
| Richness of RA fungi    | 250   | 0.009     | 0.128           |
| Richness of RA fungi    | 500   | 0.006     | 0.193           |
| Richness of RA fungi    | 1000  | 0.003     | 0.302           |
| Richness of RA fungi    | 2000  | 0.007     | 0.173           |
| Richness of RA fungi    | 5000  | 0.010     | 0.118           |
| Richness of RA fungi    | 10000 | 0.013     | 0.066           |
| Shannon of RA fungi     | 250   | -0.004    | 0.588           |
| Shannon of RA fungi     | 500   | -0.005    | 0.627           |
| Shannon of RA fungi     | 1000  | -0.011    | 0.818           |
| Shannon of RA fungi     | 2000  | -0.010    | 0.795           |
| Shannon of RA fungi     | 5000  | -0.006    | 0.675           |
| Shannon of RA fungi     | 10000 | -0.006    | 0.669           |
| Abundance of RA fungi   | 250   | -0.008    | 0.739           |
| Abundance of RA fungi   | 500   | -0.011    | 0.817           |
| Abundance of RA fungi   | 1000  | -0.012    | 0.851           |
| Abundance of RA fungi   | 2000  | -0.014    | 0.895           |
| Abundance of RA fungi   | 5000  | -0.015    | 0.917           |
| Abundance of RA fungi   | 10000 | -0.015    | 0.922           |

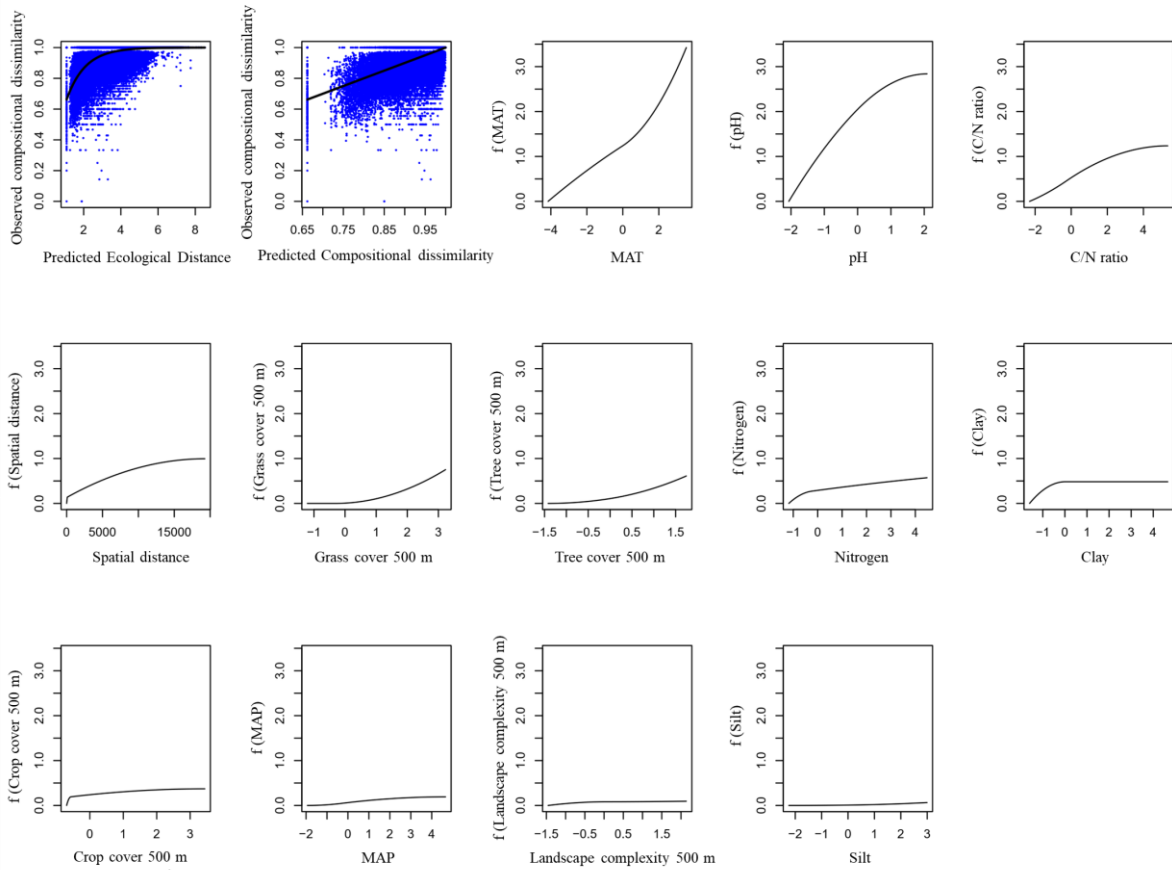

**Supplementary Fig. 1. Generalized Dissimilarity Modelling (GDM) of LFS fungal community beta diversity in relation to local and landscape variables within the 500 m radius for all plots.** The plots show the fitted I-spline partial functions for each environmental predictor included in the GDM, illustrating their relative contributions to compositional dissimilarity (Sørensen beta dissimilarity) of soil pathogenic fungi across sites (predictors contributing no deviance explained were not presented). N = 511 biologically independent samples. The percent deviance explained of the model is 37.20.

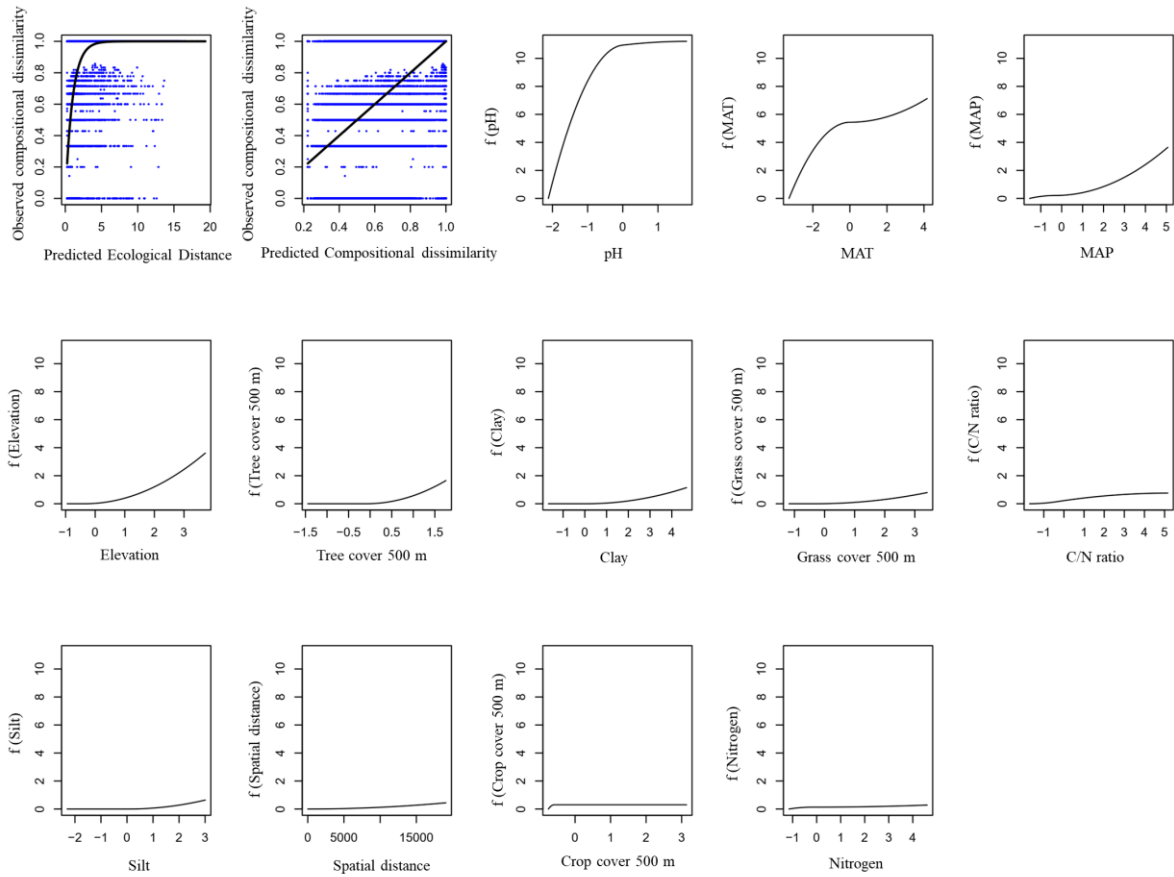

**Supplementary Fig. 2. Generalized Dissimilarity Modelling (GDM) of RA fungal community beta diversity in relation to local and landscape variables within the 500 m radius for all plots.** The plots show the fitted I-spline partial functions for each environmental predictor included in the GDM, illustrating their relative contributions to compositional dissimilarity (Sørensen beta dissimilarity) of soil pathogenic fungi across sites (predictors contributing no deviance explained were not presented). N = 511 biologically independent samples. The percent deviance explained of the model is 52.78.

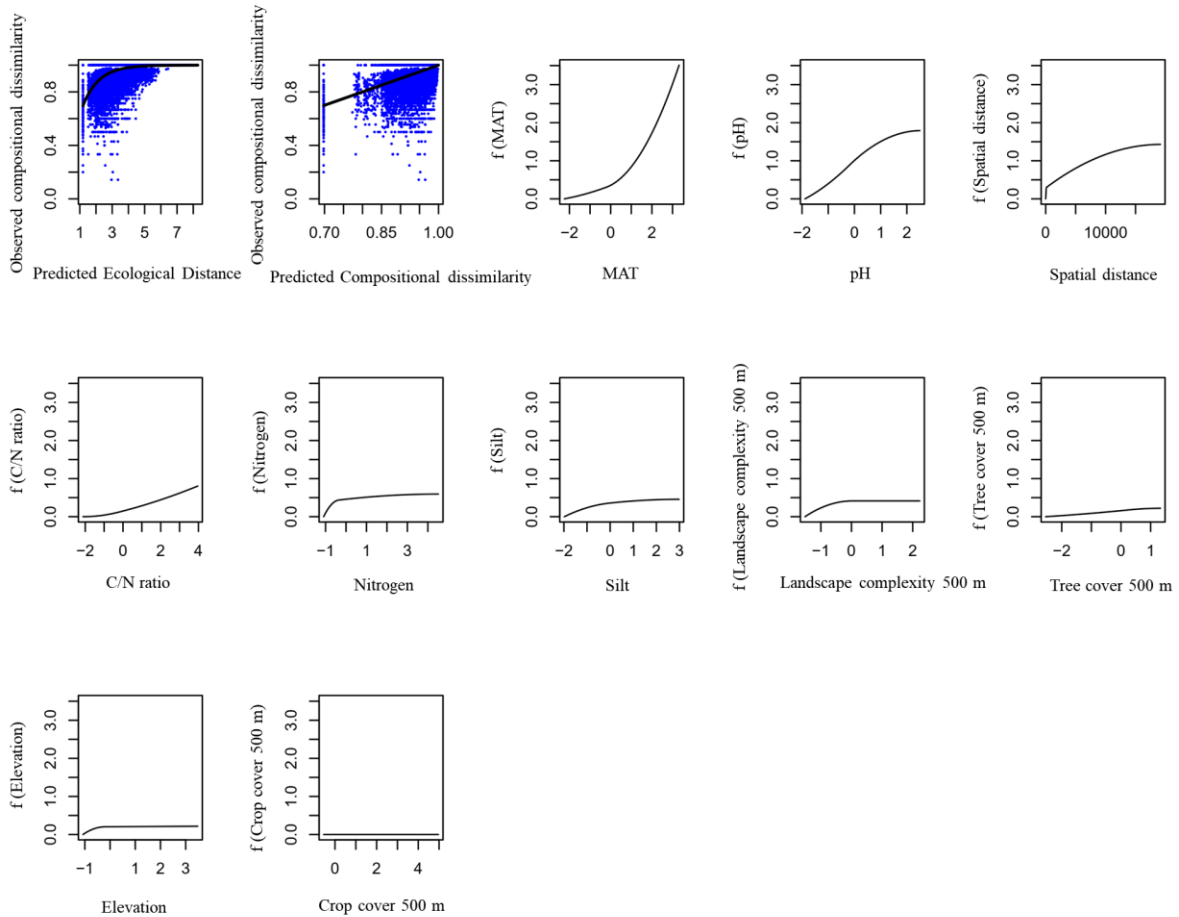

**Supplementary Fig. 3. Generalized Dissimilarity Modelling (GDM) of LFS fungal community beta diversity in relation to local and landscape variables within the 500 m radius in forest ecosystems.** The plots show the fitted I-spline partial functions for each environmental predictor included in the GDM, illustrating their relative contributions to compositional dissimilarity (Sørensen beta dissimilarity) of soil pathogenic fungi across sites (predictors contributing no deviance explained were not presented). N = 264 forest plots. The percent deviance explained of the model is 25.21.

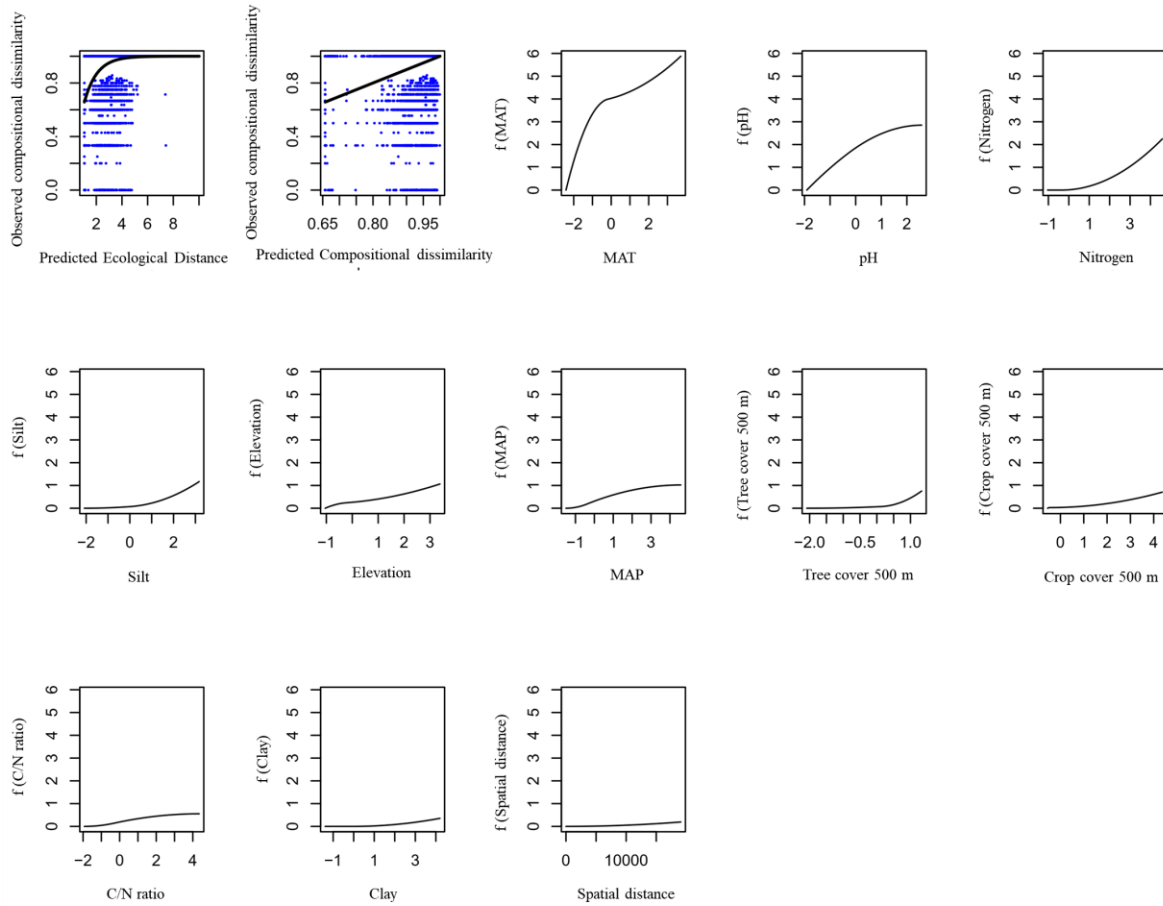

**Supplementary Fig. 4. Generalized Dissimilarity Modelling (GDM) of RA fungal community beta diversity in relation to local and landscape variables within the 500 m radius in forest ecosystems.** The plots show the fitted I-spline partial functions for each environmental predictor included in the GDM, illustrating their relative contributions to compositional dissimilarity (Sørensen beta dissimilarity) of soil pathogenic fungi across sites (predictors contributing no deviance explained were not presented). N = 264 forest plots. The percent deviance explained of the model is 14.63.

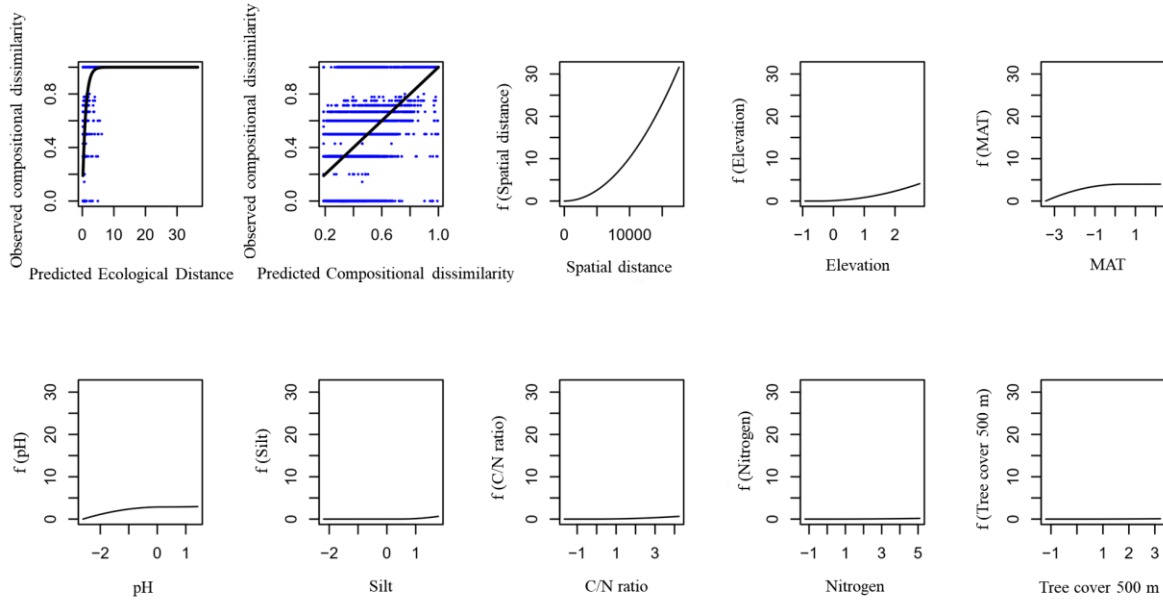

**Supplementary Fig. 5. Generalized Dissimilarity Modelling (GDM) of RA fungal community beta diversity in relation to local and landscape variables within the 500 m radius in grassland ecosystem.** The plots show the fitted I-spline partial functions for each environmental predictor included in the GDM, illustrating their relative contributions to compositional dissimilarity (Sørensen beta dissimilarity) of soil pathogenic fungi across sites (predictors contributing no deviance explained were not presented). N = 183 grassland plots. The percent deviance explained of the model is 60.90.

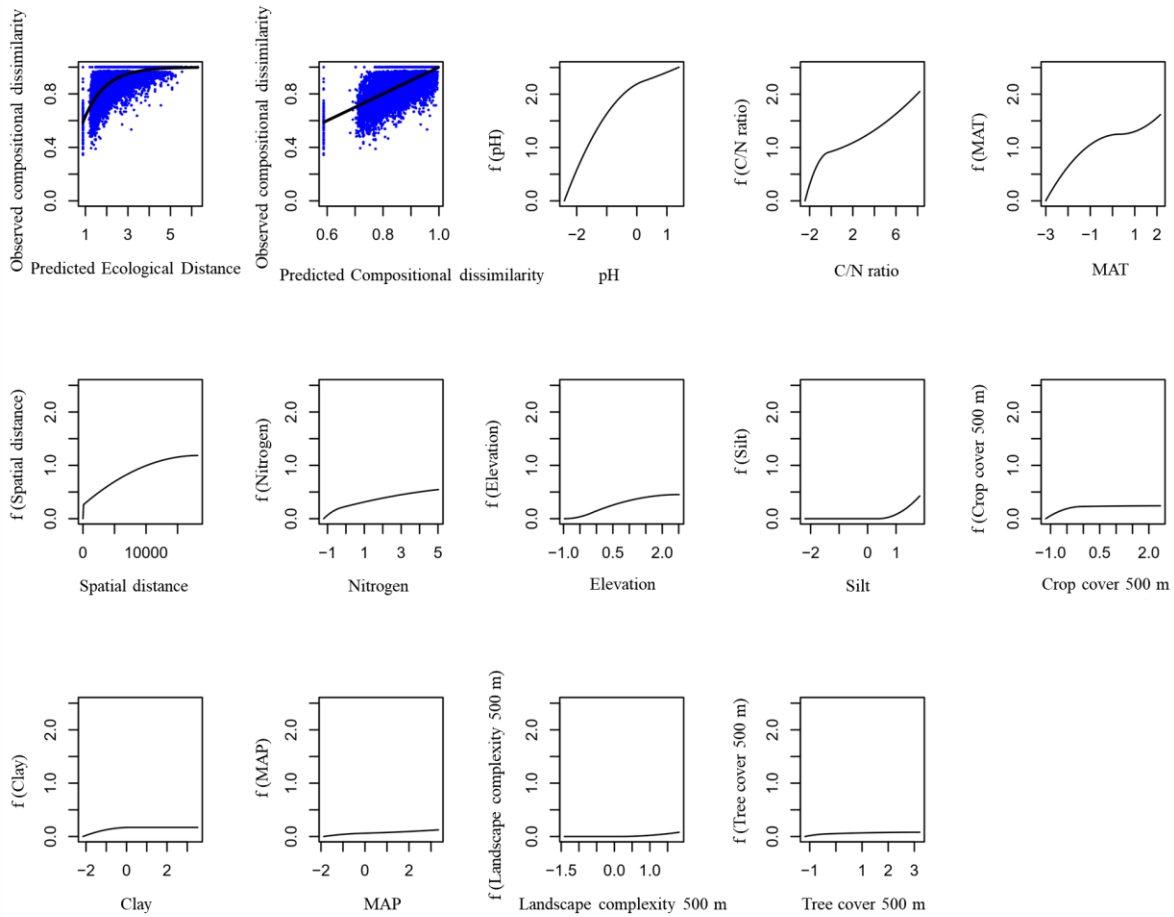

**Supplementary Fig. 6. Generalized Dissimilarity Modelling (GDM) of LFS fungal community beta diversity in relation to local and landscape variables within the 500 m radius in grassland ecosystems.** The plots show the fitted I-spline partial functions for each environmental predictor included in the GDM, illustrating their relative contributions to compositional dissimilarity (Sørensen beta dissimilarity) of soil pathogenic fungi across sites (predictors contributing no deviance explained were not presented). N = 183 grassland plots. The percent deviance explained of the model is 53.47.

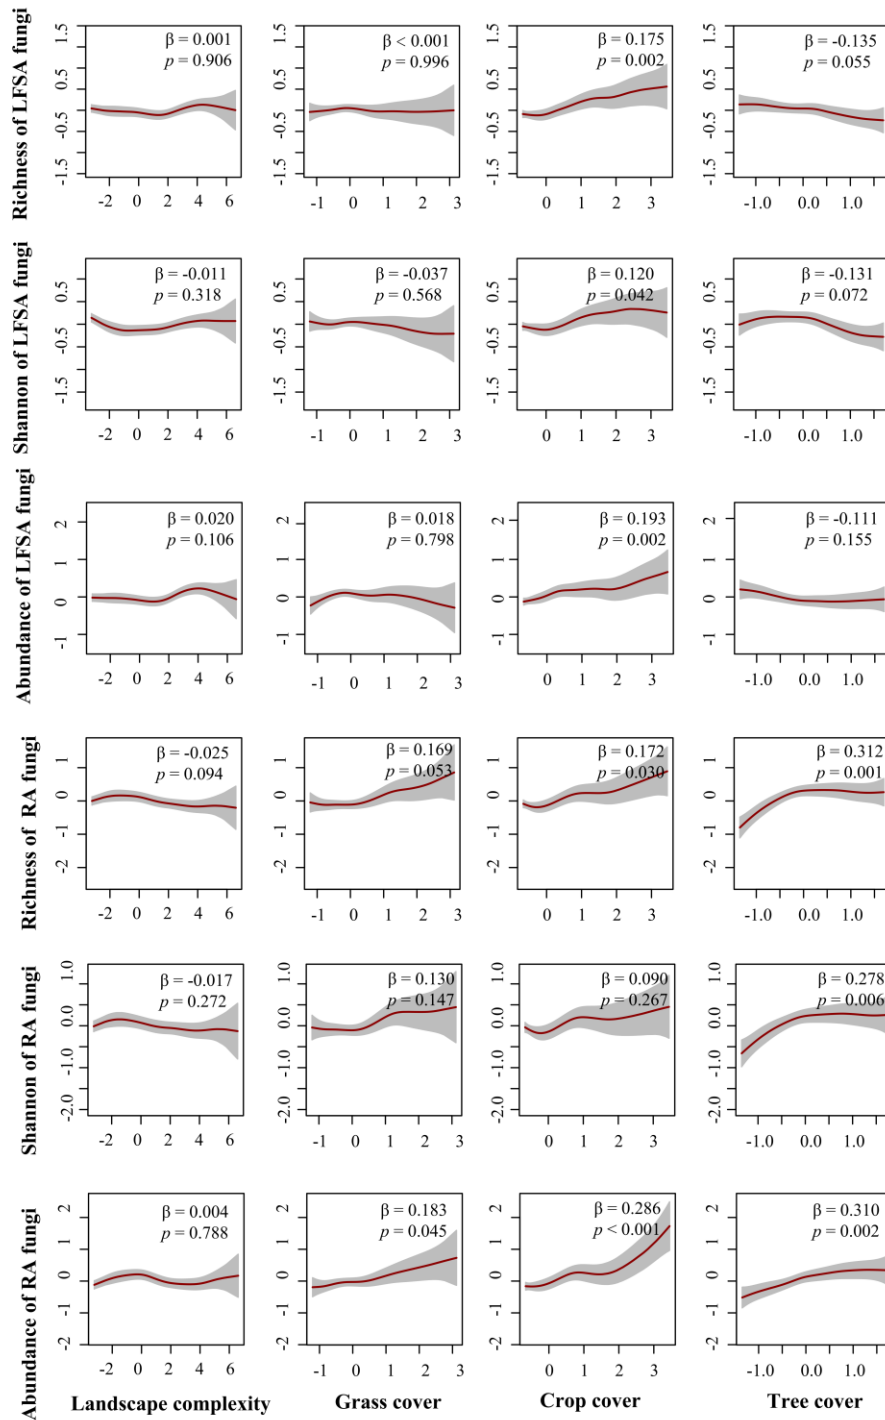

**Supplementary Fig. 7. The partial regression of leaf/fruit/seed-associated (LFSA) and root-associated (RA) fungal alpha diversity to landscape complexity, grass cover, crop cover, and tree cover within the 250 m radius for all the 511 plots. Shown are the parameter estimate (standardized regression coefficient) and *p*-value from multivariable Generalized Additive Models for Location, Scale, and Shape (GAMLSS). Light coloured shade is the region within the 95% CIs.**

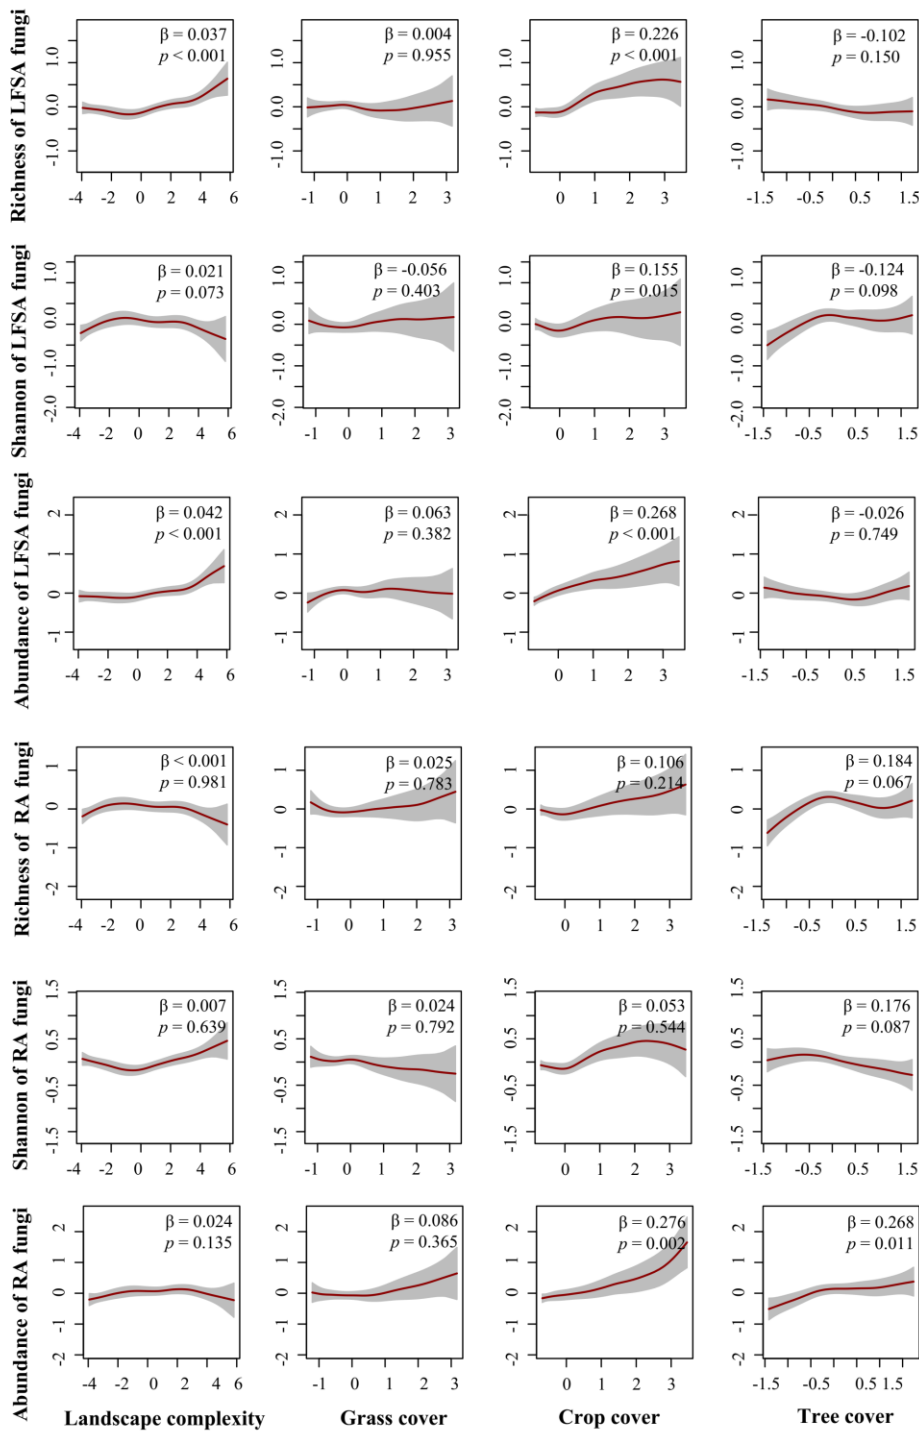

**Supplementary Fig. 8. The partial regression of leaf/fruit/seed-associated (LFSA) and root-associated (RA) fungal alpha diversity to landscape complexity, grass cover, crop cover, and tree cover within the 500 m radius for all the 511 plots. Shown are the parameter estimate (standardized regression coefficient) and  $p$ -value from multivariable Generalized Additive Models for Location, Scale, and Shape (GAMLSS). Light coloured shade is the region within the 95% CIs.**

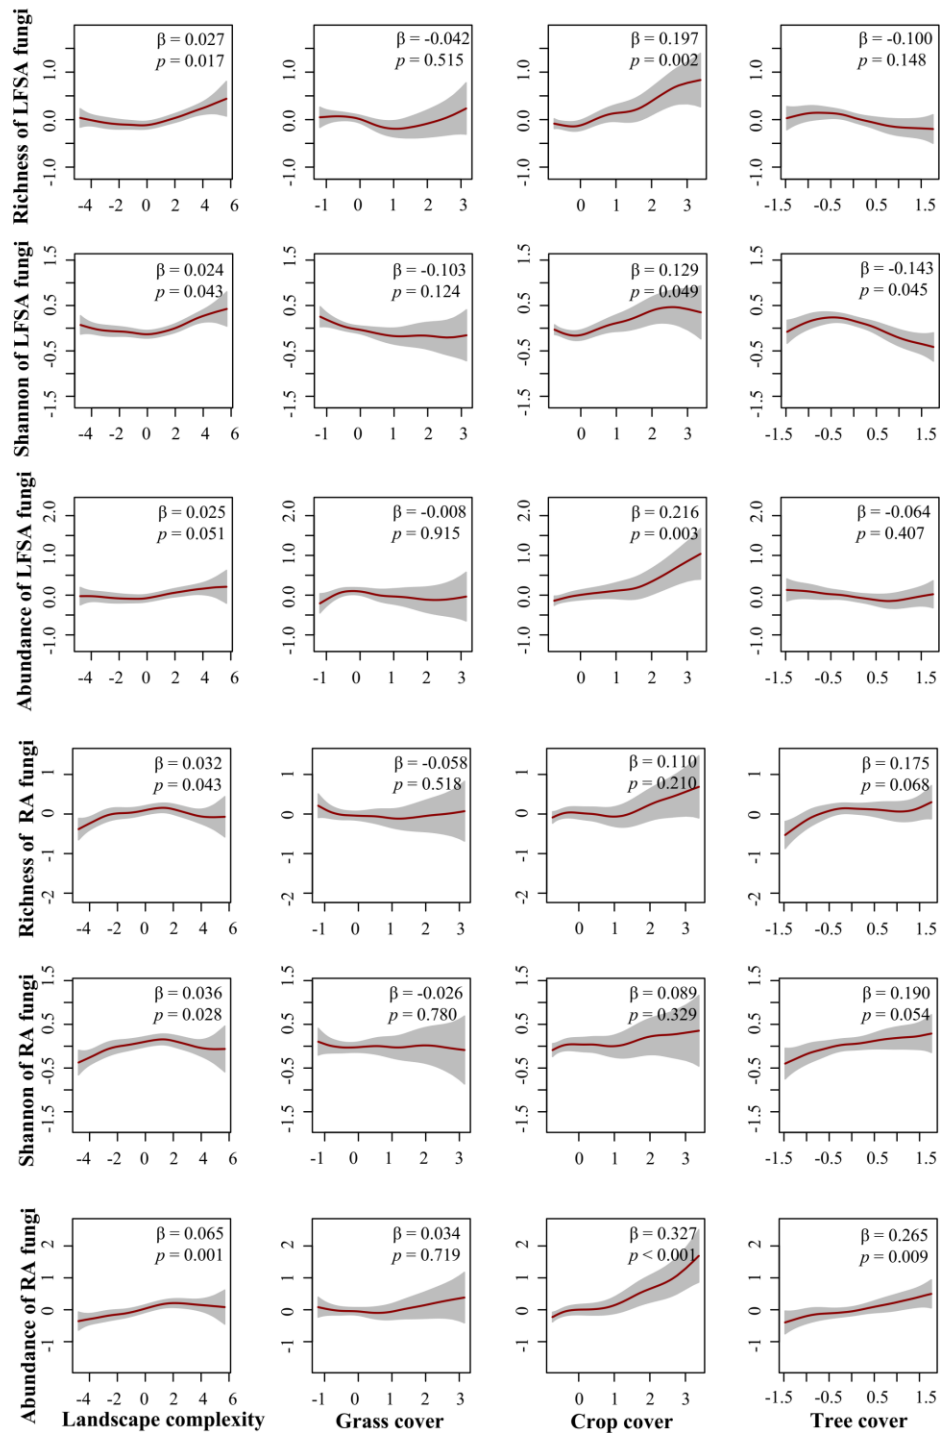

**Supplementary Fig. 9. The partial regression of leaf/fruit/seed-associated (LFSA) and root-associated (RA) fungal alpha diversity to landscape complexity, grass cover, crop cover, and tree cover within the 1,000 m radius for all the 511 plots.** Shown are the parameter estimate (standardized regression coefficient) and  $p$ -value from multivariable Generalized Additive Models for Location, Scale, and Shape (GAMLSS). Light coloured shade is the region within the 95% CIs.

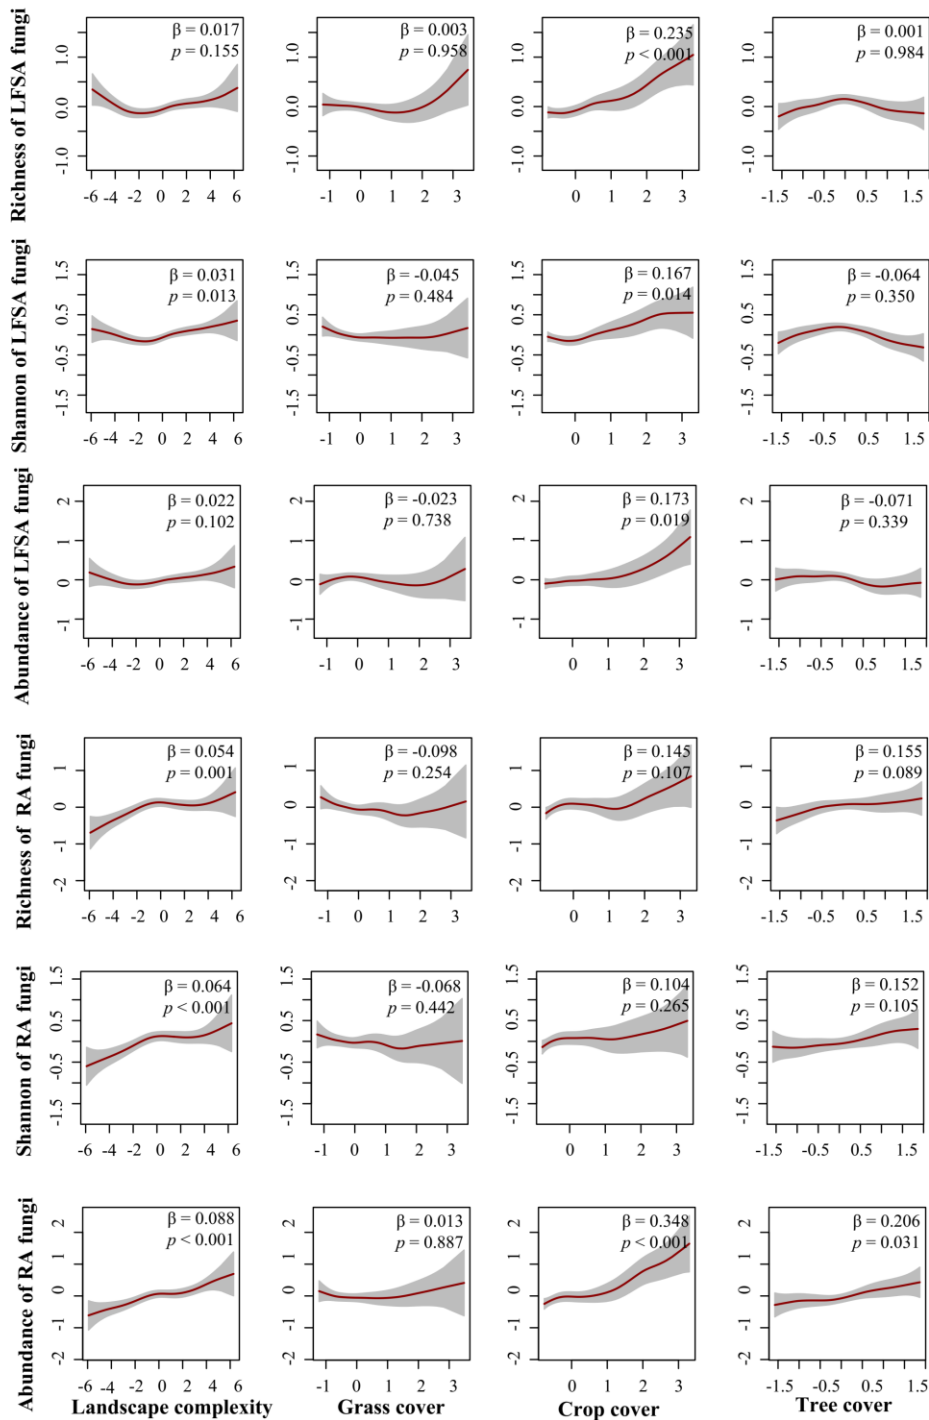

**Supplementary Fig. 10.** The partial regression of leaf/fruit/seed-associated (LFSA) and root-associated (RA) fungal alpha diversity to landscape complexity, grass cover, crop cover, and tree cover within the 2,000 m radius for all the 511 plots. Shown are the parameter estimate (standardized regression coefficient) and  $p$ -value from multivariable Generalized Additive Models for Location, Scale, and Shape (GAMLSS). Light coloured shade is the region within the 95% CIs.

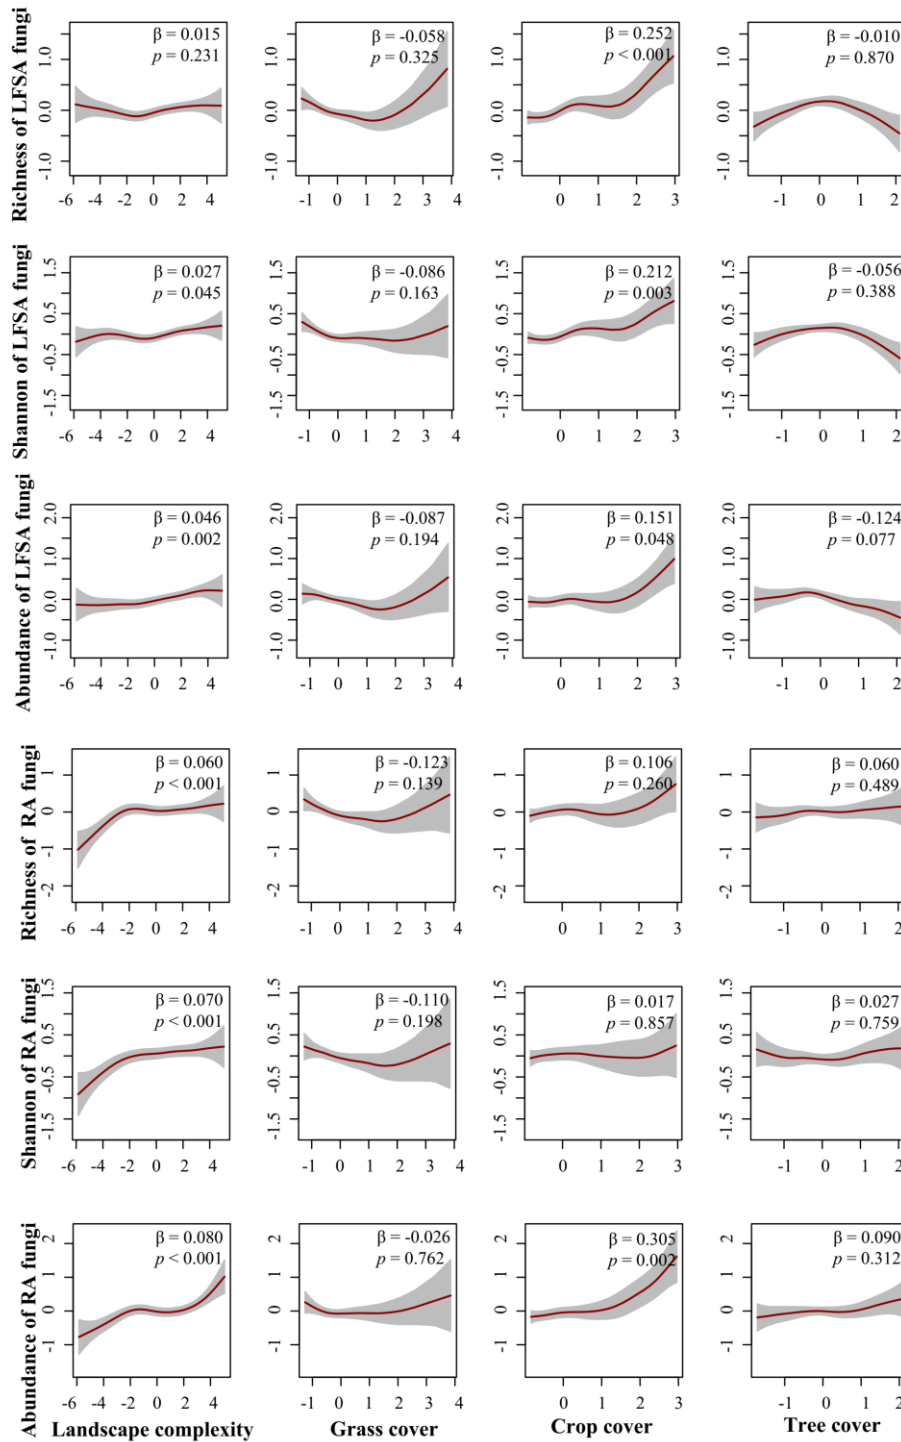

**Supplementary Fig. 11.** The partial regression of leaf/fruit/seed-associated (LFSA) and root-associated (RA) fungal alpha diversity to landscape complexity, grass cover, crop cover, and tree cover within the 5,000 m radius to all the 511 plots. Shown are the parameter estimate (standardized regression coefficient) and  $p$ -value from multivariable Generalized Additive Models for Location, Scale, and Shape (GAMLSS). Light coloured shade is the region within the 95% CIs.

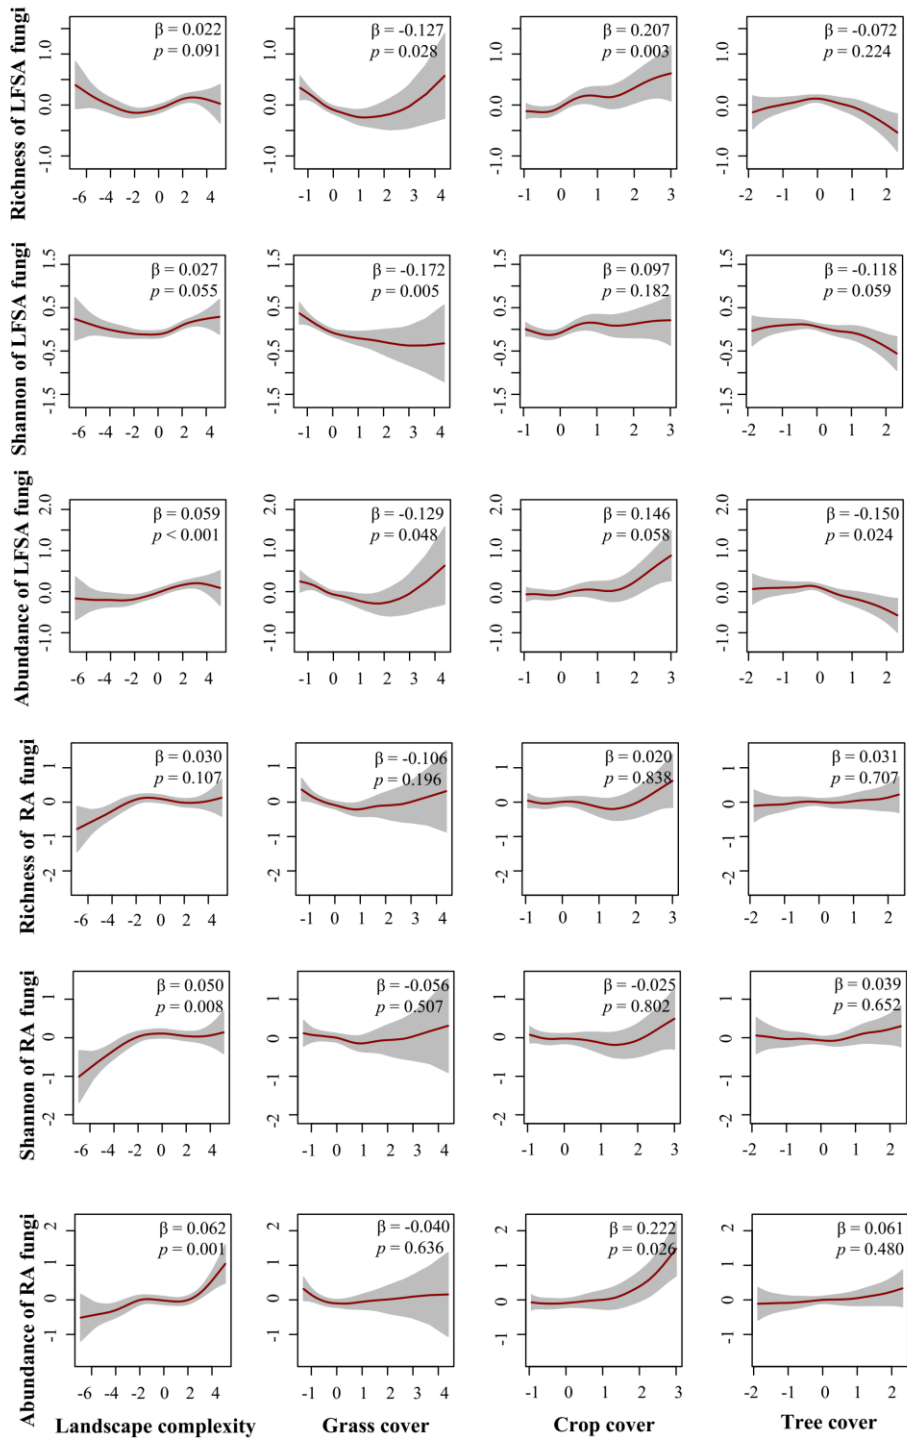

**Supplementary Fig. 12.** The partial regression of leaf/fruit/seed-associated (LFSA) and root-associated (RA) fungal alpha diversity to landscape complexity, grass cover, crop cover, and tree cover within the 10,000 m radius for all the 511 plots. Shown are the parameter estimate (standardized regression coefficient) and *p*-value from multivariable Generalized Additive Models for Location, Scale, and Shape (GAMLSS). Light coloured shade is the region within the 95% CIs.

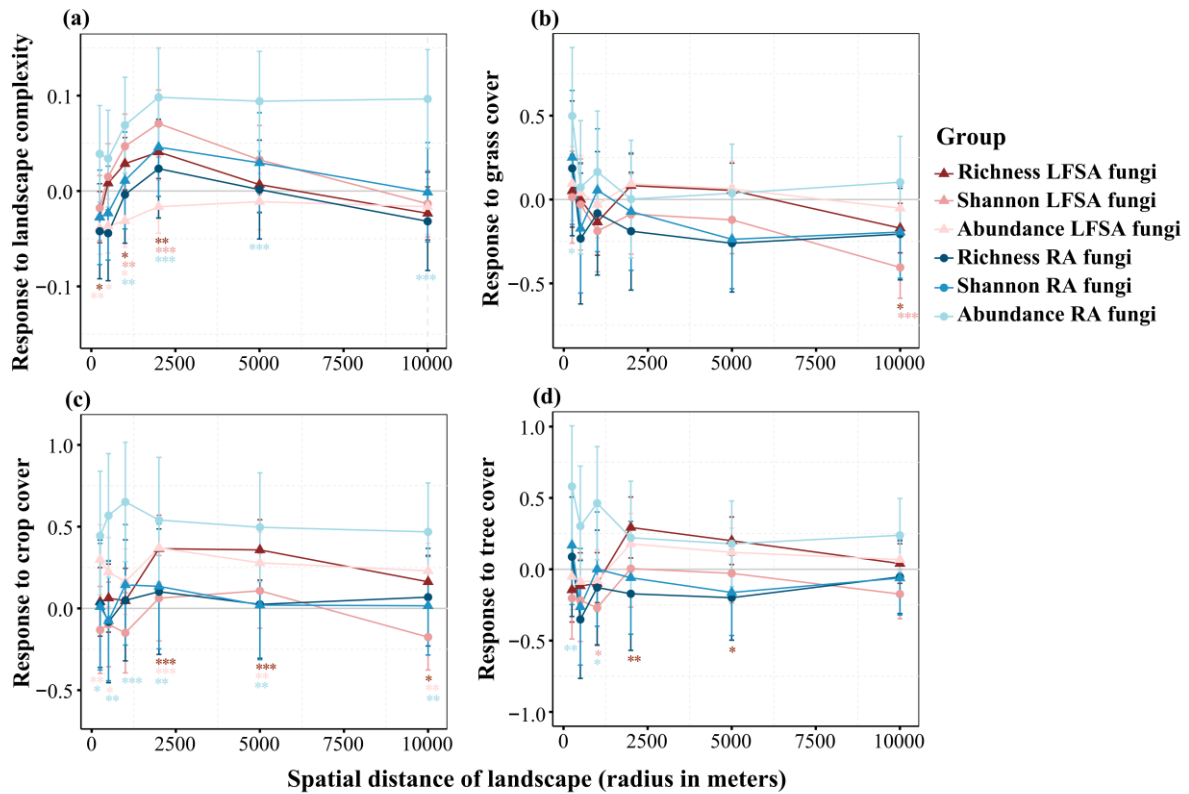

**Supplementary Fig. 13. Landscape effects on leaf/fruit/seed-associated and root-associated fungal alpha diversity across spatial scales in forest ecosystems.**

Leaf/fruit/seed-associated (LFSA) and root-associated (RA) fungal diversity as affected by (a) landscape complexity, (b) grass cover, (c) crop cover, and (d) tree cover across six spatial scales (250 m, 500 m, 1,000 m, 2,000 m, 5,000 m, and 10,000 m radii) ( $n = 264$  forest plots). Data are presented as model-estimated standardized regression coefficients  $\pm 95\%$  confidence intervals (CIs) derived from multivariate Generalized Additive Models for Location, Scale, and Shape (GAMLSS). Red lines from dark to light indicate the richness, Shannon diversity and relative abundance of LFSA fungi, while the blue lines correspond to those of RA fungi. Statistical significance is determined using two-sided Wald tests from multivariate GAMLSS without adjustment for multiple comparisons. Significance levels are indicated as \*\*\*  $p \leq 0.001$ ; \*\*  $p \leq 0.01$ ; \*  $p \leq 0.05$ .

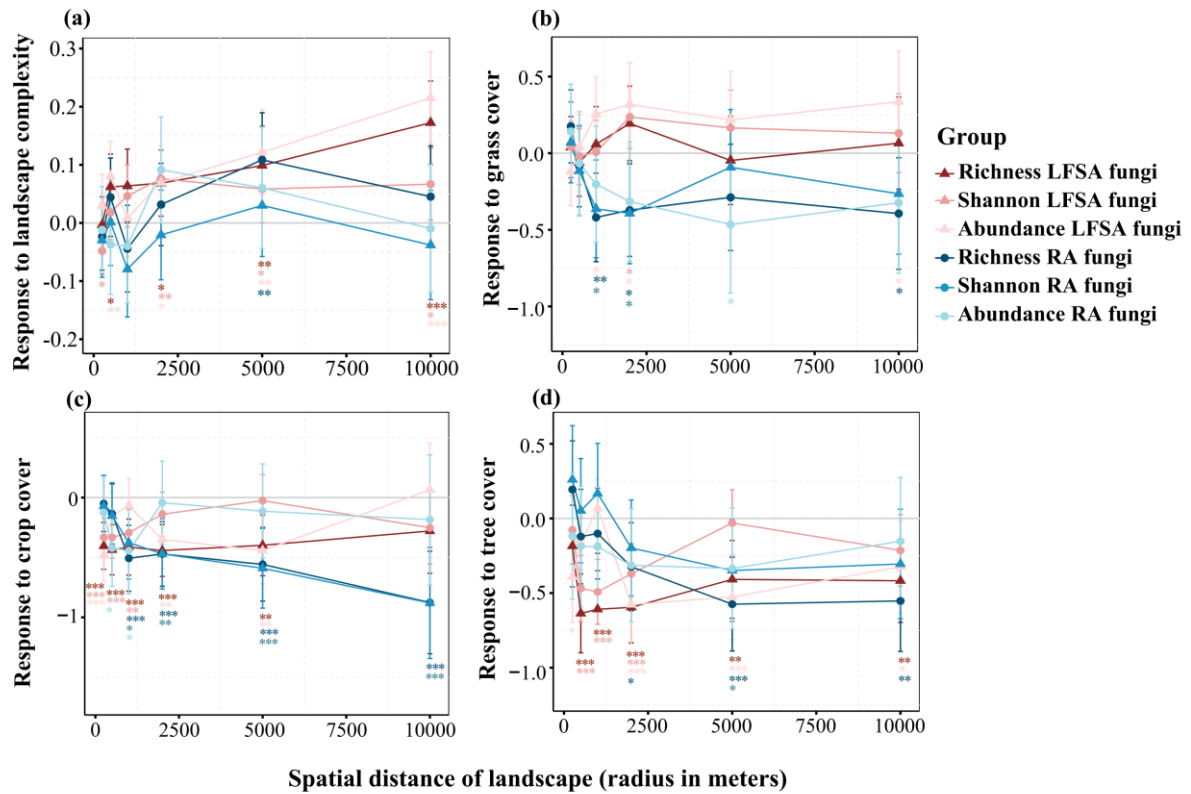

**Supplementary Fig. 14. Landscape effects on leaf/fruit/seed-associated and root-associated fungal alpha diversity across spatial scales in grassland ecosystems.**

Leaf/fruit/seed-associated (LFSA) and root-associated (RA) fungal diversity as affected by (a) landscape complexity, (b) grass cover, (c) crop cover, and (d) tree cover across six spatial scales (250 m, 500 m, 1,000 m, 2,000 m, 5,000 m, and 10,000 m radii) ( $n = 183$  grassland plots). Data are presented as model-estimated standardized regression coefficients  $\pm$  95% confidence intervals (CIs) derived from multivariate Generalized Additive Models for Location, Scale, and Shape (GAMLSS). Red lines from dark to light indicate the richness, Shannon diversity and relative abundance of LFSA fungi, while the blue lines correspond to those of RA fungi. Statistical significance is determined using two-sided Wald tests from multivariate GAMLSS without adjustment for multiple comparisons. The significance levels are indicated as \*\*\*  $p \leq 0.001$ ; \*\*  $p \leq 0.01$ ; \*  $p \leq 0.05$ .

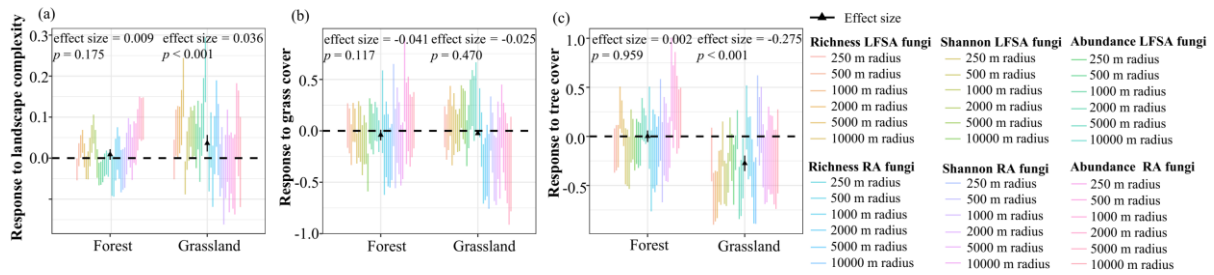

**Supplementary Fig. 15. Overall landscape effects on soil pathogenic fungal alpha diversity across ecosystems.** Overall effects of (a) landscape complexity, (b) grass cover, and (c) tree cover on soil pathogenic fungal alpha diversity between forest and grassland ecosystems. Colored lines denote the 95% confidence intervals of model-estimated standardized regression coefficients across two fungal groups (LFSA and RA fungi), three diversity indices (richness, Shannon diversity, and relative abundance), and six spatial scales (250 m to 10,000 m radii) from multivariate Generalized Additive Models for Location, Scale, and Shape (GAMLSS). Black triangles represent the overall effect sizes. Effect sizes are estimated using random-effects meta-analyses ( $n = 36$  biologically independent samples), and statistical significance is evaluated using two-sided z-tests without adjustment for multiple comparisons. Effect size values and associated  $p$ -values are reported for each category.

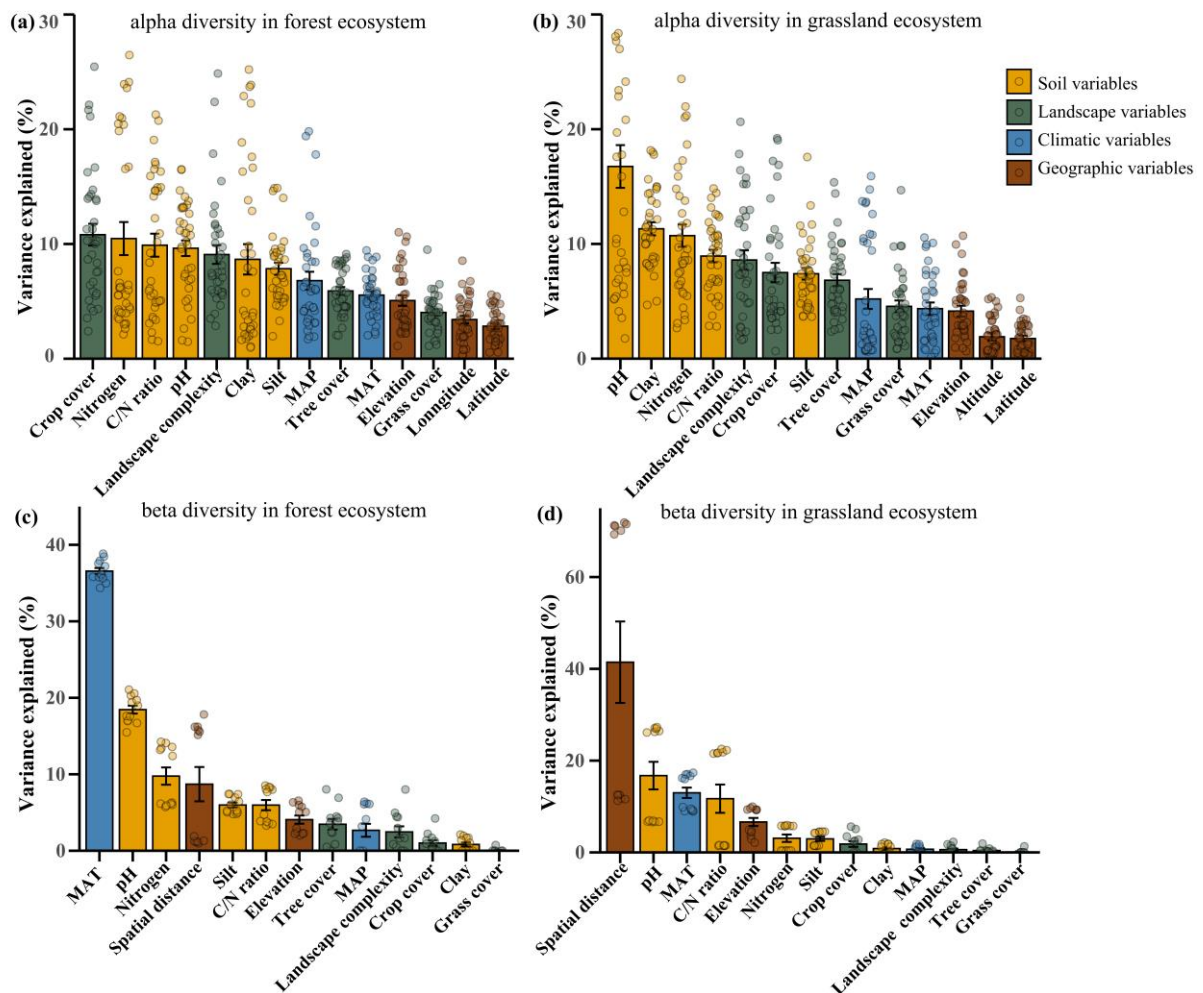

**Supplementary Fig. 16. Relative contributions of environmental predictors to soil pathogenic fungal alpha and beta diversity across ecosystems.** Average relative contribution (proportion of variance explained, %) of each predictor variable to soil pathogenic fungal (a)–(b) alpha ( $n = 36$  biologically independent samples) and (c)–(d) beta ( $n = 12$  biologically independent samples) diversity, covering two fungal groups (LFSA and RA fungi), four diversity indices (richness, Shannon diversity, and relative abundance for alpha diversity and Sørensen dissimilarity for beta diversity), and six spatial scales (250 m to 10,000 m radii) between forest and grassland ecosystems, respectively. Data are shown as mean  $\pm$  s.e. Predictor variables are categorized into four groups: soil, landscape, climatic, and geographic factors.

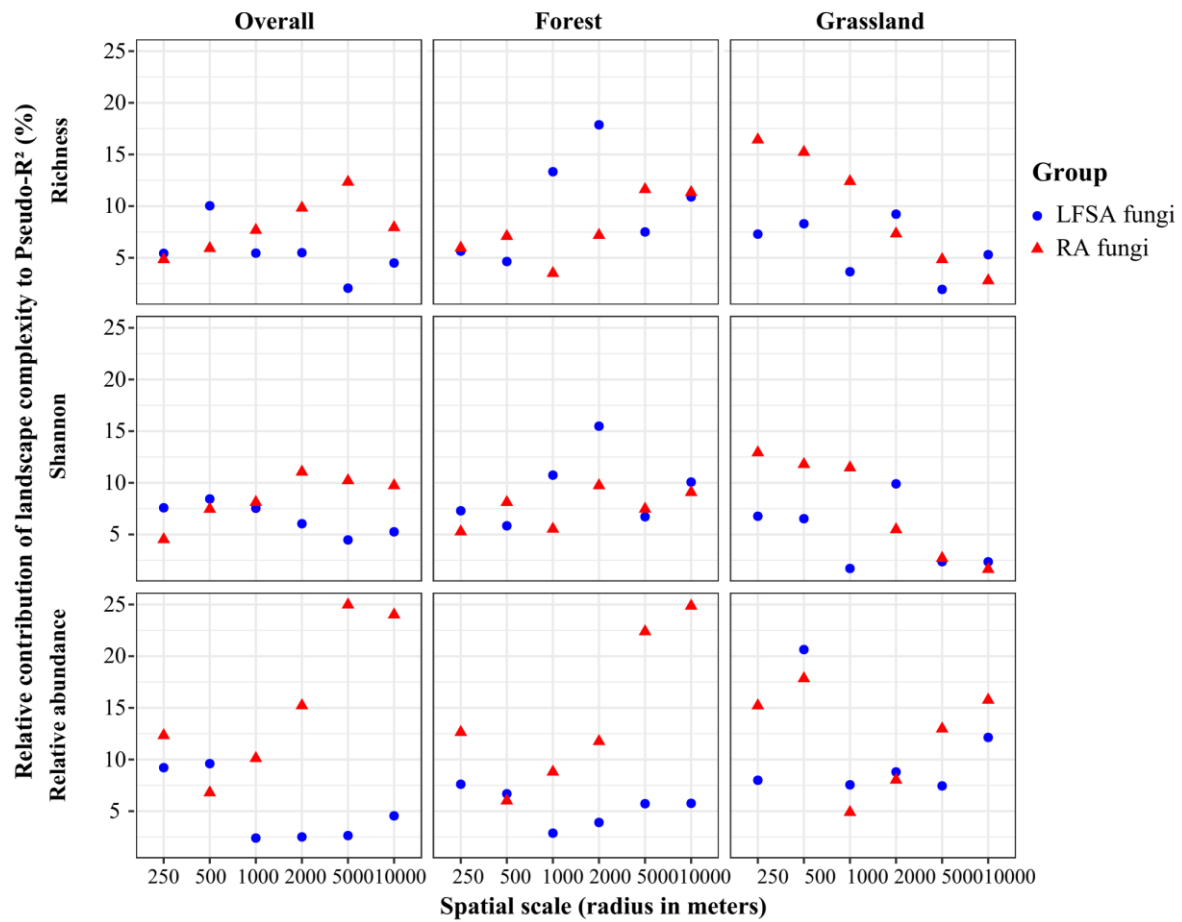

**Supplementary Fig. 17. Relative contribution of landscape complexity to leaf/fruit/seed-associated and root-associated fungal alpha diversity across spatial scales (250 m to 10,000 m radii).** Relative contribution (proportion of variance explained, %) of landscape complexity to the Pseudo-R<sup>2</sup> of multivariate Generalized Additive Models for Location, Scale, and Shape (GAMLSS) on leaf/fruit/seed-associated (LFSA) and root-associated (RA) fungal alpha diversity (richness, Shannon diversity and relative abundance) for overall plots (n = 511 plots), forest (n = 264 plots) and grassland (n = 183 plots) ecosystems.

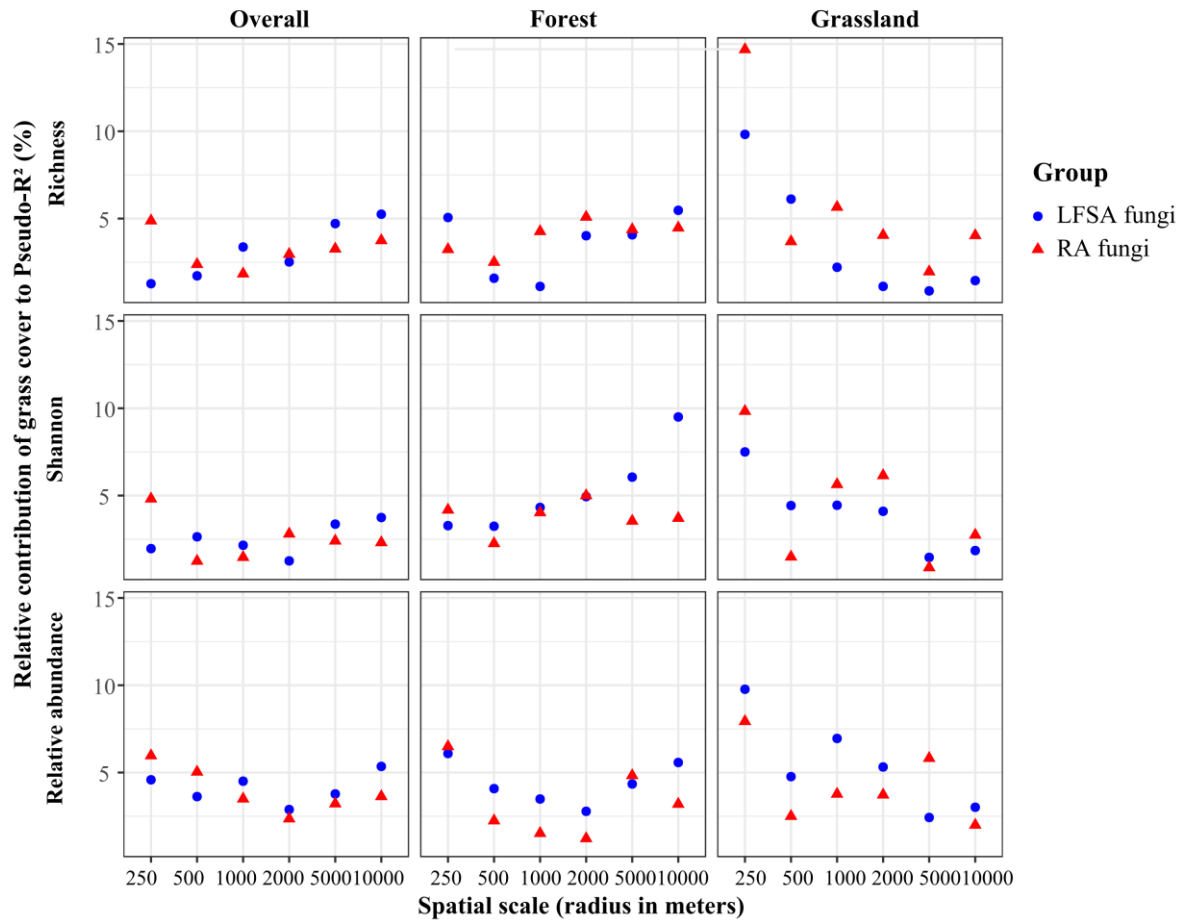

**Supplementary Fig. 18. Relative contribution of grass cover to leaf/fruit/seed-associated and root-associated fungal alpha diversity across spatial scales (250 m to 10,000 m radii).** Relative contribution (proportion of variance explained, %) of landscape complexity to the Pseudo-R<sup>2</sup> of multivariate Generalized Additive Models for Location, Scale, and Shape (GAMLSS) on leaf/fruit/seed-associated (LFSA) and root-associated (RA) fungal alpha diversity (richness, Shannon diversity and relative abundance) for overall plots (n = 511 plots), forest (n = 264 plots) and grassland (n = 183 plots) ecosystems.

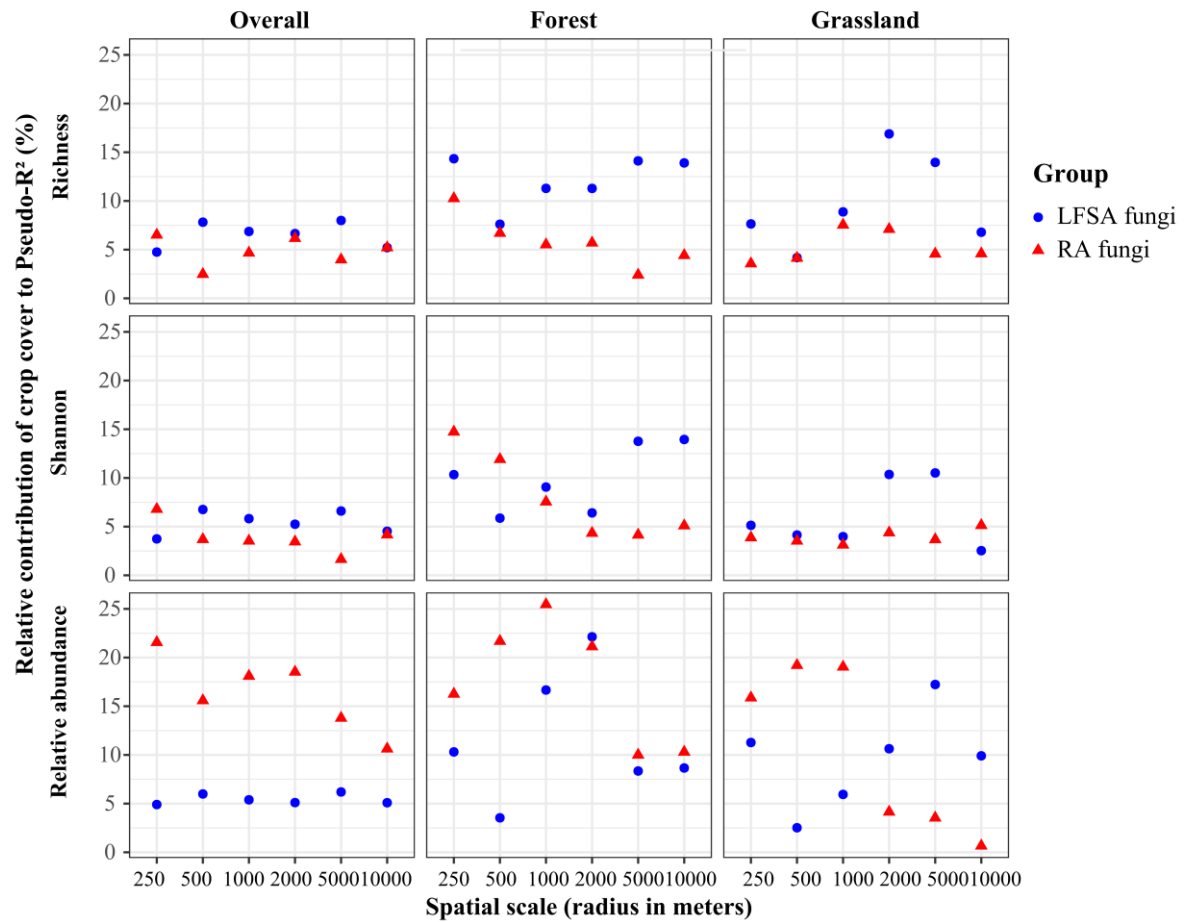

**Supplementary Fig. 19. Relative contribution of crop cover to leaf/fruit/seed-associated and root-associated fungal alpha diversity across spatial scales (250 m to 10,000 m radii).** Relative contribution (proportion of variance explained, %) of landscape complexity to the Pseudo-R<sup>2</sup> of multivariate Generalized Additive Models for Location, Scale, and Shape (GAMLSS) on leaf/fruit/seed-associated (LFSA) and root-associated (RA) fungal alpha diversity (richness, Shannon diversity and relative abundance) for overall plots (n = 511 plots), forest (n = 264 plots) and grassland (n = 183 plots) ecosystems.

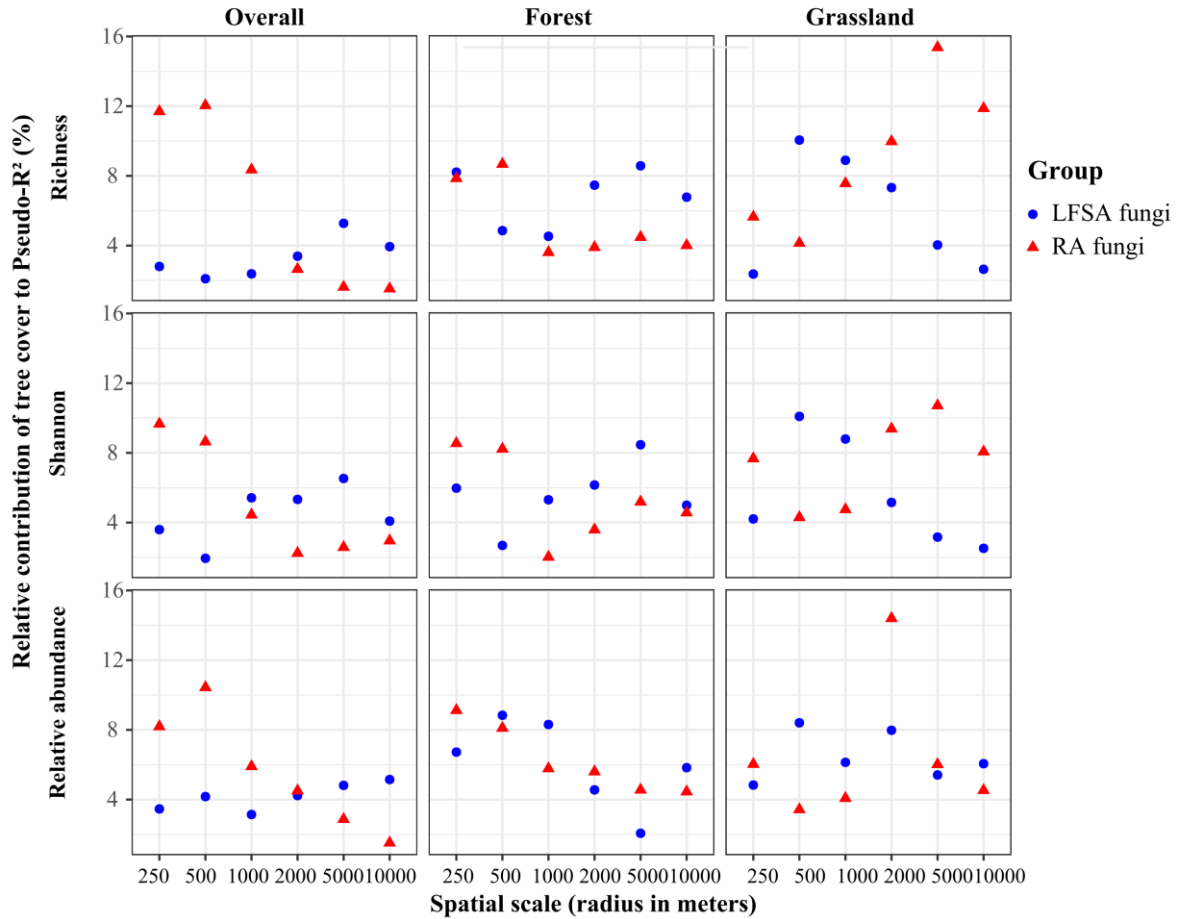

**Supplementary Fig. 20. Relative contribution of tree cover to leaf/fruit/seed-associated and root-associated fungal alpha diversity across spatial scales (250 m to 10,000 m radii).** Relative contribution (proportion of variance explained, %) of landscape complexity to the Pseudo-R<sup>2</sup> of multivariate Generalized Additive Models for Location, Scale, and Shape (GAMLSS) on leaf/fruit/seed-associated (LFSA) and root-associated (RA) fungal alpha diversity (richness, Shannon diversity and relative abundance) for overall plots (n = 511 plots), forest (n = 264 plots) and grassland (n = 183 plots) ecosystems.

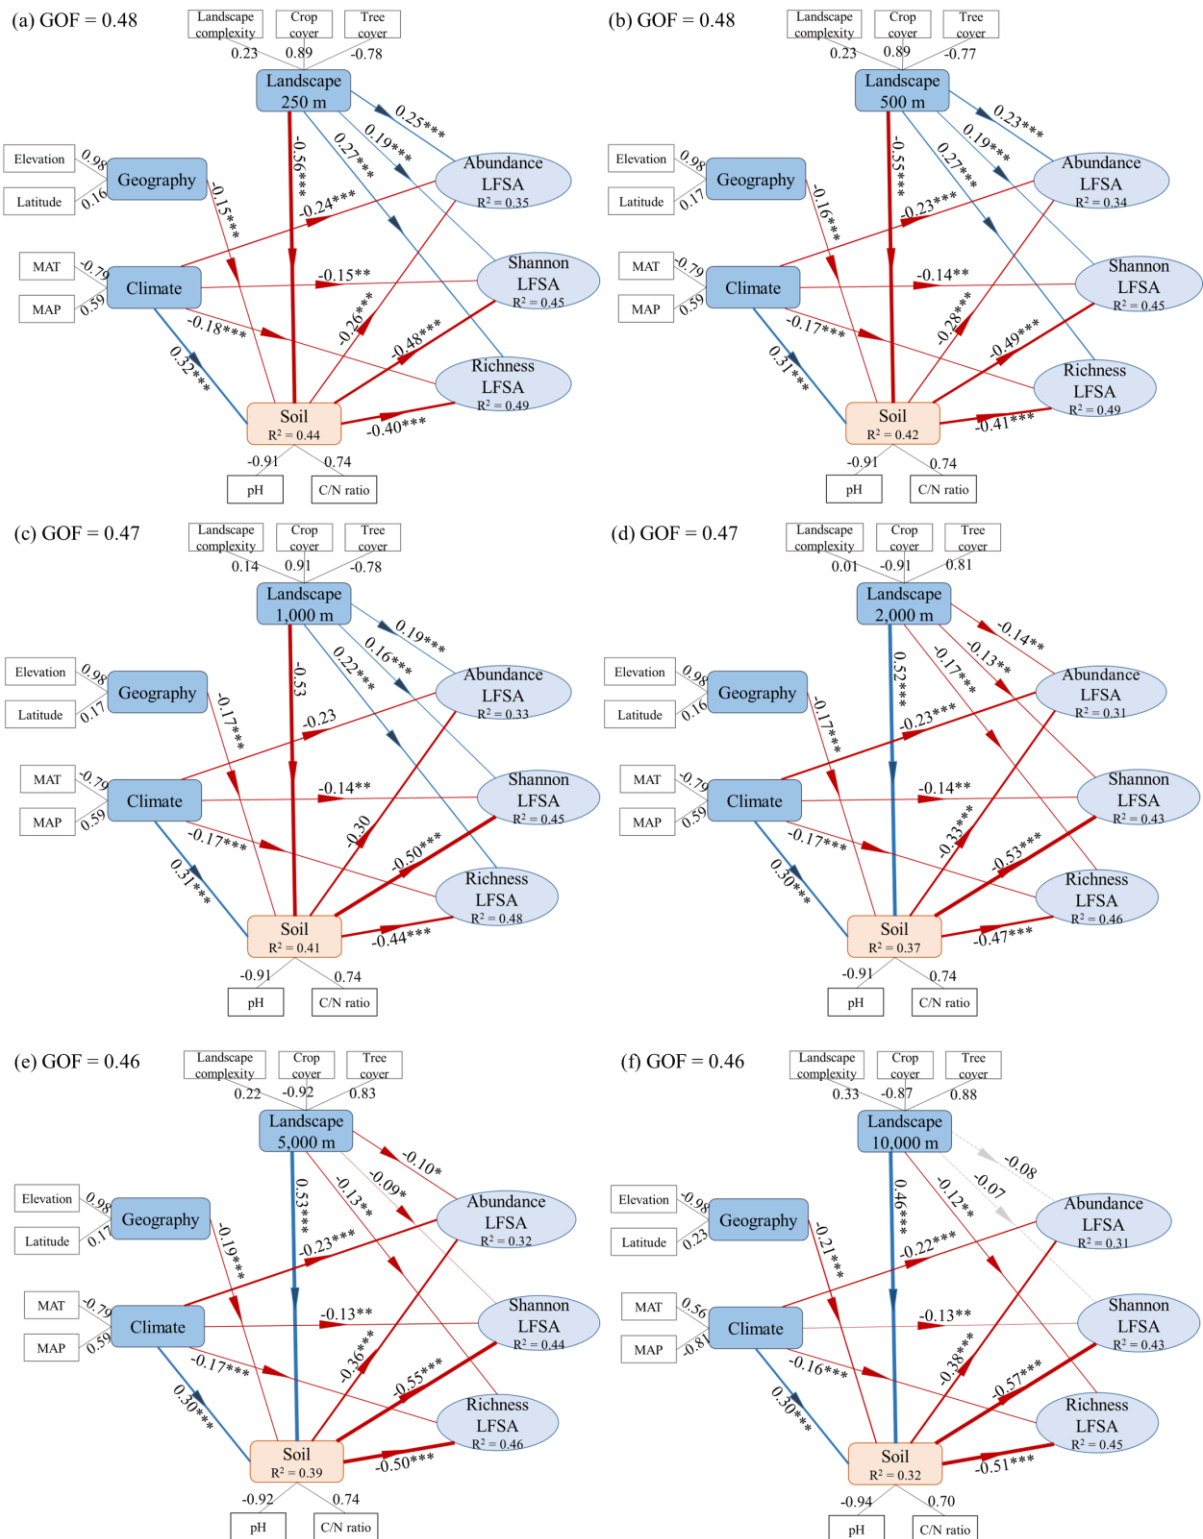

**Supplementary Fig. 21. Optimal direct and indirect drivers of soil leaf/fruit/seed-associated fungal alpha diversity.** Partial Least Squares Path Modeling (PLSPM) assesses the direct and indirect effects of landscape (across six spatial scales), geographic, climatic, and soil factors on leaf/fruit/seed-associated (LFSA) fungal alpha diversity, including richness, Shannon diversity, and relative abundance, across all plots ( $n = 511$  plots). Panels (a)–(f) show the effects of landscape factors at different spatial scales (i.e., 250 m, 500 m,

1,000 m, 2,000 m, 5,000 m, and 10,000 m radii). Solid and dashed arrows represent significant or non-significant pathways, respectively, with standardized path coefficients shown alongside each path. Significance levels are denoted as  $*p < 0.05$ ,  $**p < 0.01$ ,  $***p < 0.001$ . Arrow widths reflect the relative strength of the path coefficients. The  $R^2$  values indicate the proportion of variance explained for each response variable. The landscape latent variable includes landscape complexity, crop cover, and tree cover; the geographic variable includes elevation and latitude; the climatic variable includes MAT and MAP; and the soil variable includes soil pH and C/N ratio. The values linking indicators to latent variables represent loadings, with higher loadings indicating stronger associations with the corresponding latent construct. GoF indicates the goodness-of-fit of the model.

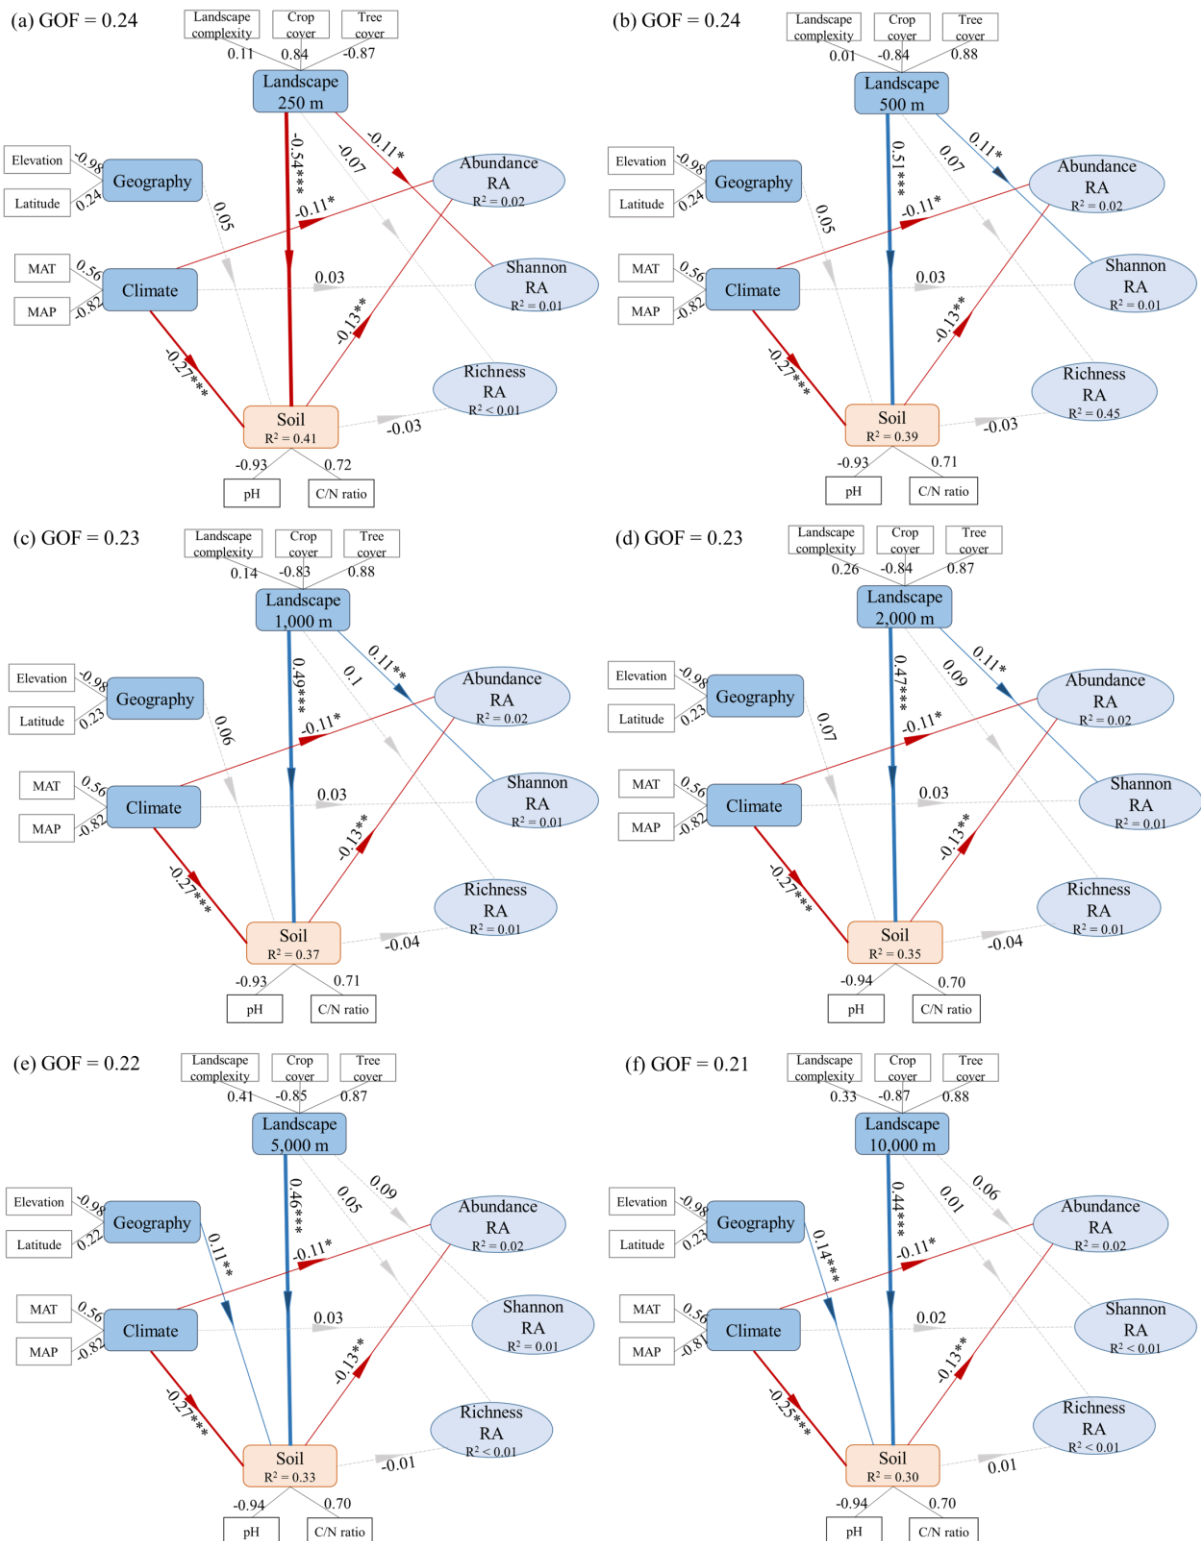

**Supplementary Fig. 22. Optimal direct and indirect drivers of soil root-associated fungal alpha diversity.** Partial Least Squares Path Modeling (PLSPM) assesses the direct and indirect effects of landscape (across six spatial scales), geographic, climatic, and soil factors on root-associated (RA) fungal alpha diversity, including richness, Shannon diversity, and relative abundance, across all plots (n = 511 plots). Panels (a)–(f) show the effects of

landscape factors at different spatial scales (i.e., 250 m, 500 m, 1,000 m, 2,000 m, 5,000 m, and 10,000 m radii). Solid and dashed arrows represent significant or non-significant pathways, respectively, with standardized path coefficients shown alongside each path. Significance levels are denoted as  $*p < 0.05$ ,  $**p < 0.01$ ,  $***p < 0.001$ . Arrow widths reflect the relative strength of the path coefficients. The  $R^2$  values indicate the proportion of variance explained for each response variable. The landscape latent variable includes landscape complexity, crop cover, and tree cover; the geographic variable includes elevation and latitude; the climatic variable includes MAT and MAP; and the soil variable includes soil pH and C/N ratio. The values linking indicators to latent variables represent loadings, with higher loadings indicating stronger associations with the corresponding latent construct. GoF indicates the goodness-of-fit of the model.

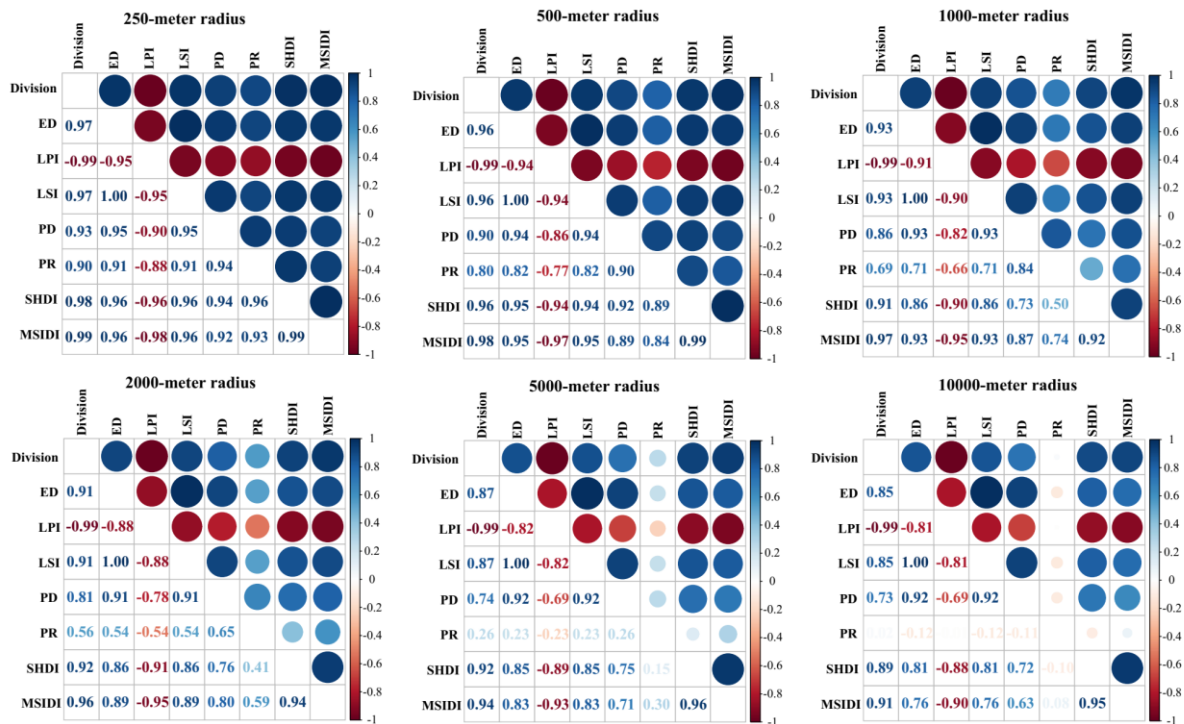

**Supplementary Figure 23.** The two-sided Spearman's correlation of eight landscape metrics across six spatial scales (250 m, 500 m, 1,000 m, 2,000 m, 5,000 m, and 10,000 m radii). N = 511 biologically independent samples without adjustment for multiple comparisons. The metrics include, landscape division index (Division), edge density (ED), largest patch index (LPI), landscape shape index (LSI), patch density (PD), Patch richness (PR), Shannon diversity index (SHDI), modified Simpson's diversity index (MSIDI).

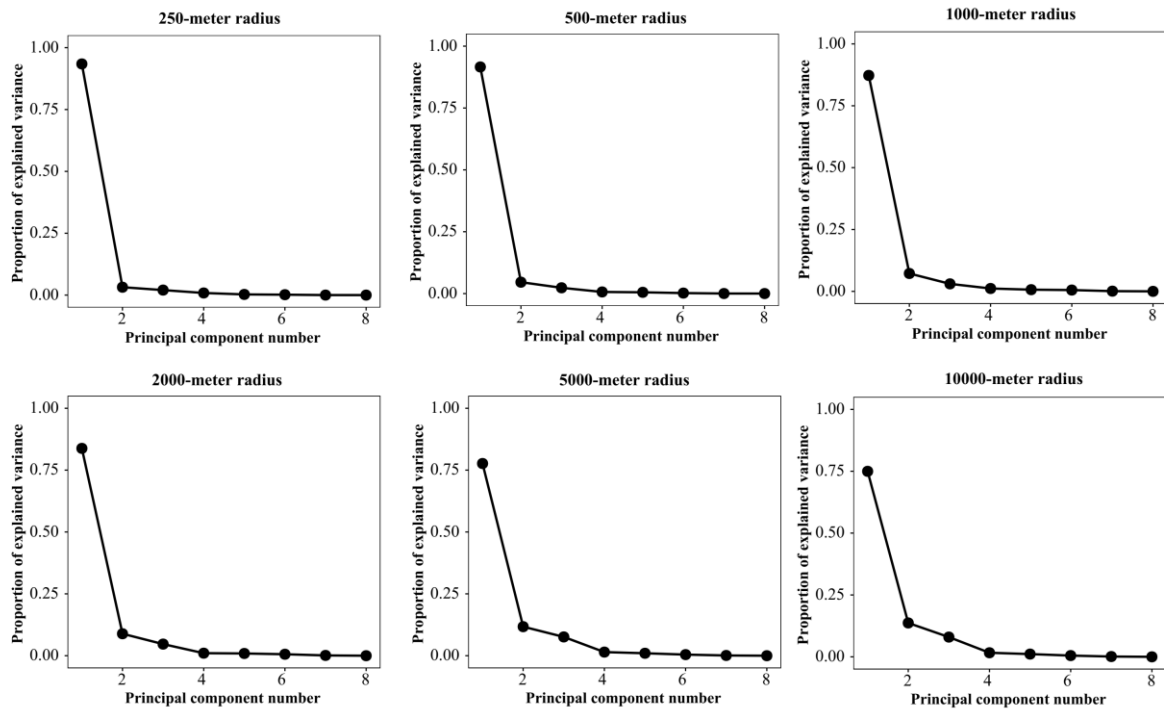

**Supplementary Figure 24. Proportion of variance explained by each principal component derived from principal component analysis (PCA) of eight landscape metrics across six spatial scales (250 m, 500 m, 1,000 m, 2,000 m, 5,000 m, and 10,000 m radii).** N = 511 biologically independent samples without adjustment for multiple comparisons. The analyzed metrics include landscape division index (Division), edge density (ED), largest patch index (LPI), landscape shape index (LSI), patch density (PD), patch richness (PR), Shannon diversity index (SHDI), and modified Simpson's diversity index (MSIDI).

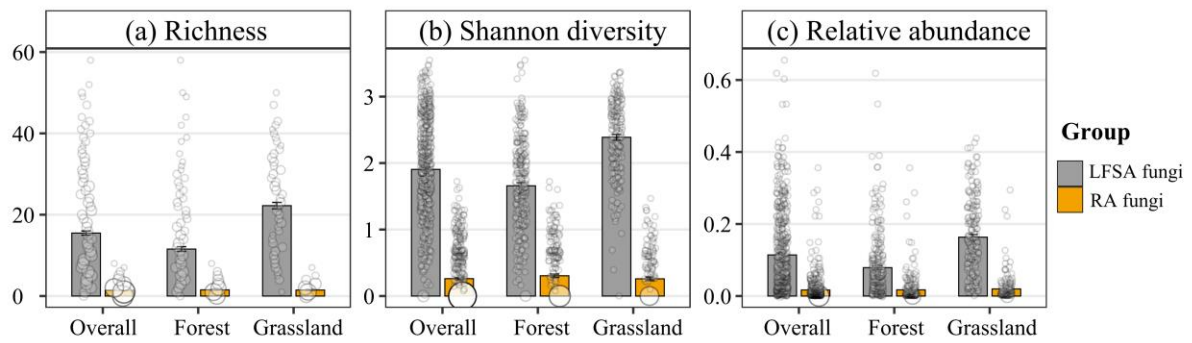

**Supplementary Fig. 25. Alpha diversity of soil pathogenic fungi.** Panels (a)–(c) display the richness, Shannon diversity, and relative abundance (mean  $\pm$  s.e.) of leaf/fruit/seed-associated (LFSA) and root-associated (RA) fungal communities across all plots ( $n = 511$  plots), forest ( $n = 264$  plots) and grassland ( $n = 183$  plots) ecosystems. The circles represent the original diversity values of each plot, with larger circles indicate more frequent values.

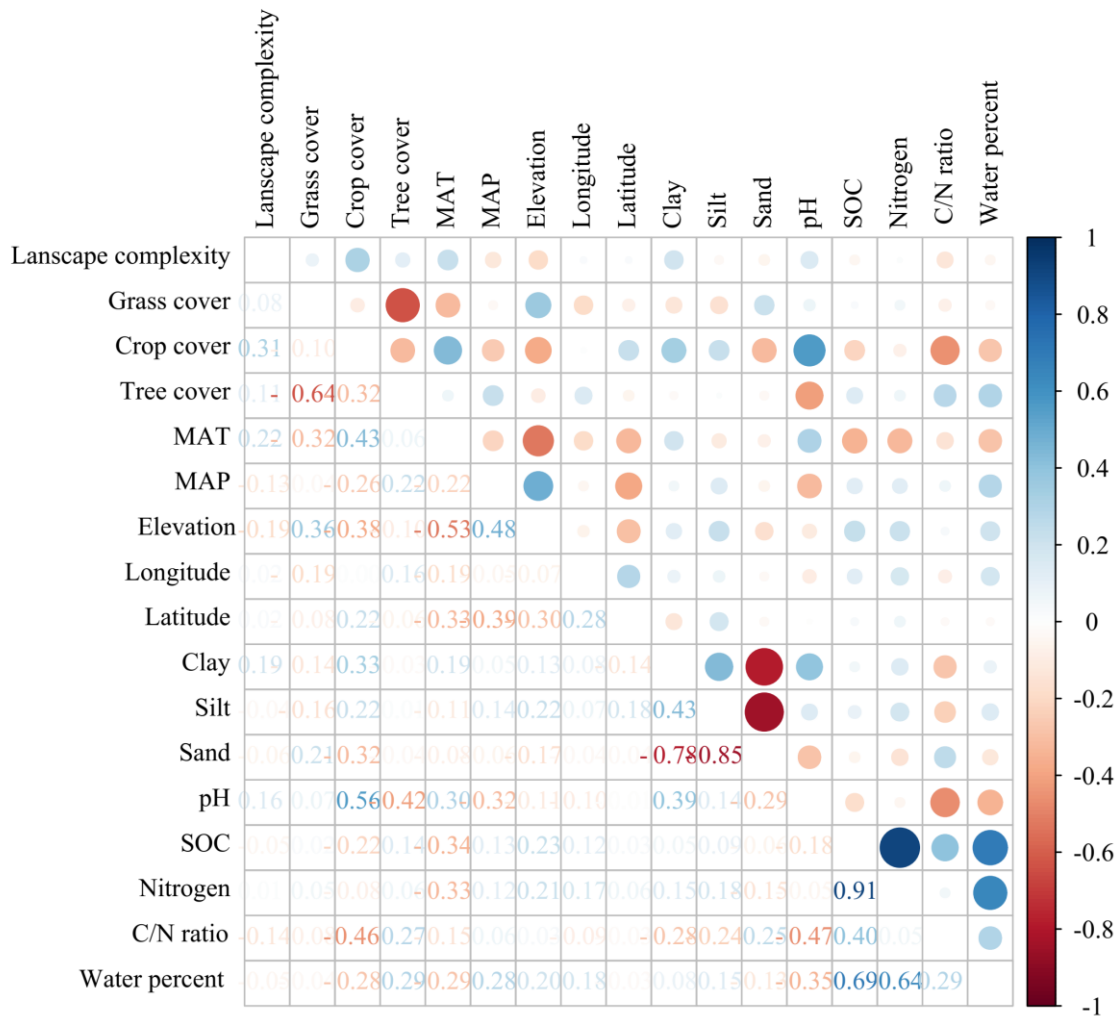

**Supplementary Fig. 26. The two-sided Spearman's correlation of landscape, geographic, climatic and soil factors.** N = 511 biologically independent samples without adjustment for multiple comparisons. Landscape factors include the landscape complexity index, grass cover, crop cover and tree cover (at the spatial distance of 500 m). Geographic factors include elevation, longitude and latitude. Climatic factors include mean annual temperature (MAT) and mean annual precipitation (MAP). Soil factors include soil clay content, silt content, sand content, pH, soil organic carbon (SOC), total nitrogen content, SOC/total nitrogen (C/N) ratio and water percent. Since soil sand content, SOC and water percent had high correlations with other variables, they are not included in further analysis. Blue shading represents positive correlations, and red shading represents negative correlations.

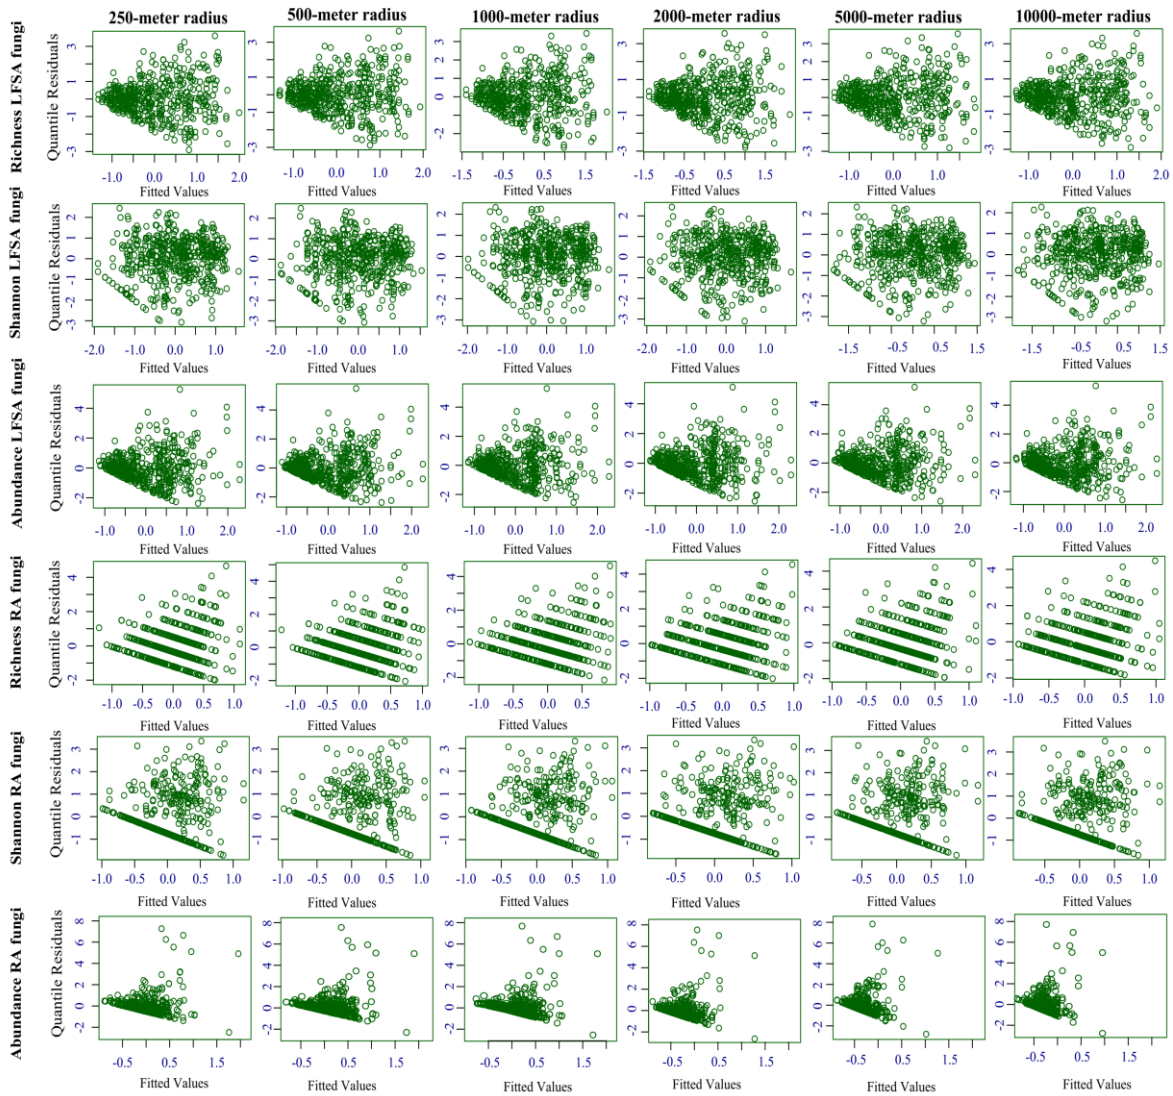

**Supplementary Fig. 27. Quantile residual diagnostics for multivariate generalized additive models of soil pathogenic fungal diversity.** Plots of quantile residuals against fitted values to assess the homogeneity of residual variances from the multivariate Generalized Additive Models for Location, Scale, and Shape (GAMLSS). Models are fitted for soil fungal richness, Shannon diversity, and relative abundance of leaf/fruit/seed-associated (LFSA) and root-associated (RA) fungi, evaluated across six competing models at spatial scales ranging from 250 m to 10,000 m radii for all 511 plots.

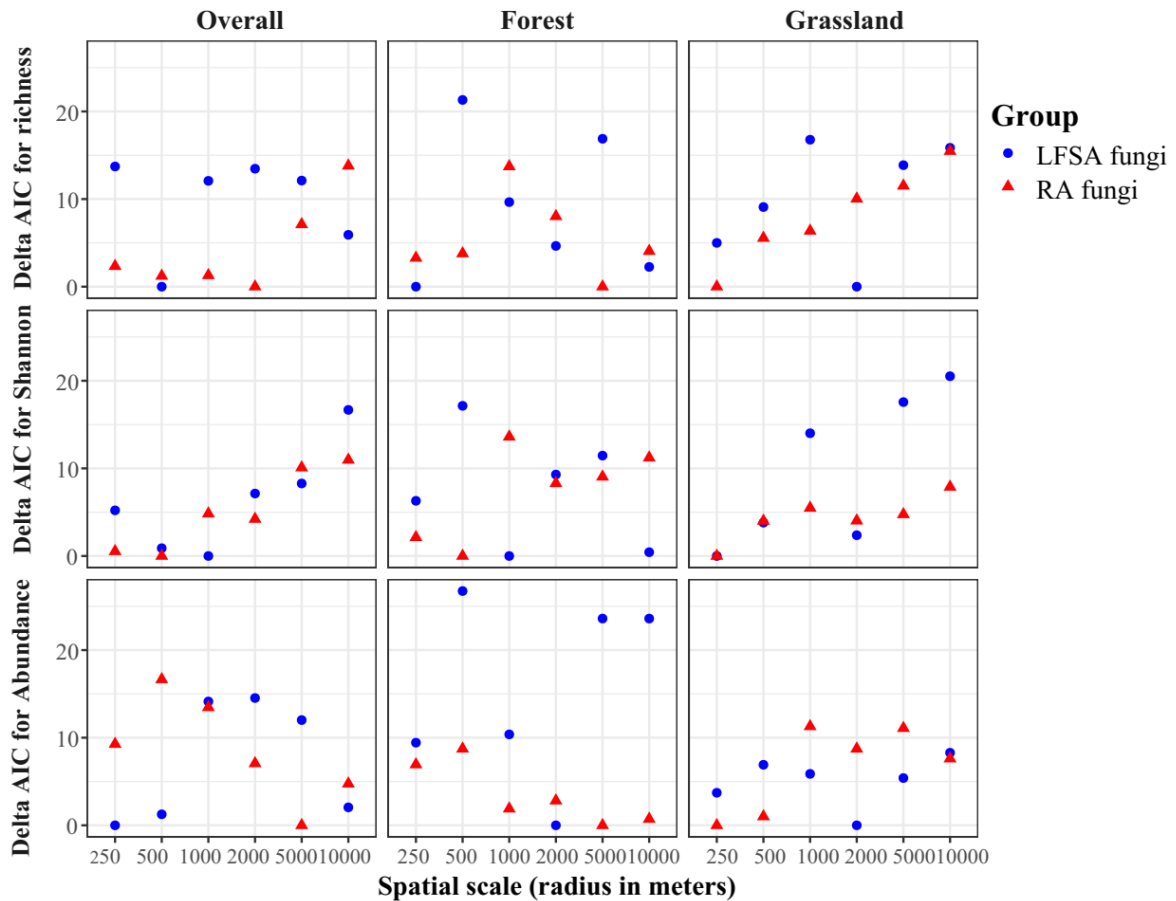

**Supplementary Fig. 28. Model performance of multivariate generalized additive models for soil pathogenic fungal alpha diversity across spatial scales (250 m to 10,000 m radii).**

The delta-AIC of all multivariate Generalized Additive Models for Location, Scale, and Shape (GAMLSS) on leaf/fruit/seed-associated (LFSA) and root-associated (RA) fungal alpha diversity for overall plots (n = 511 plots), forest (n = 264 plots) and grassland (n = 183 plots) ecosystems. The lower AIC, the better the model.

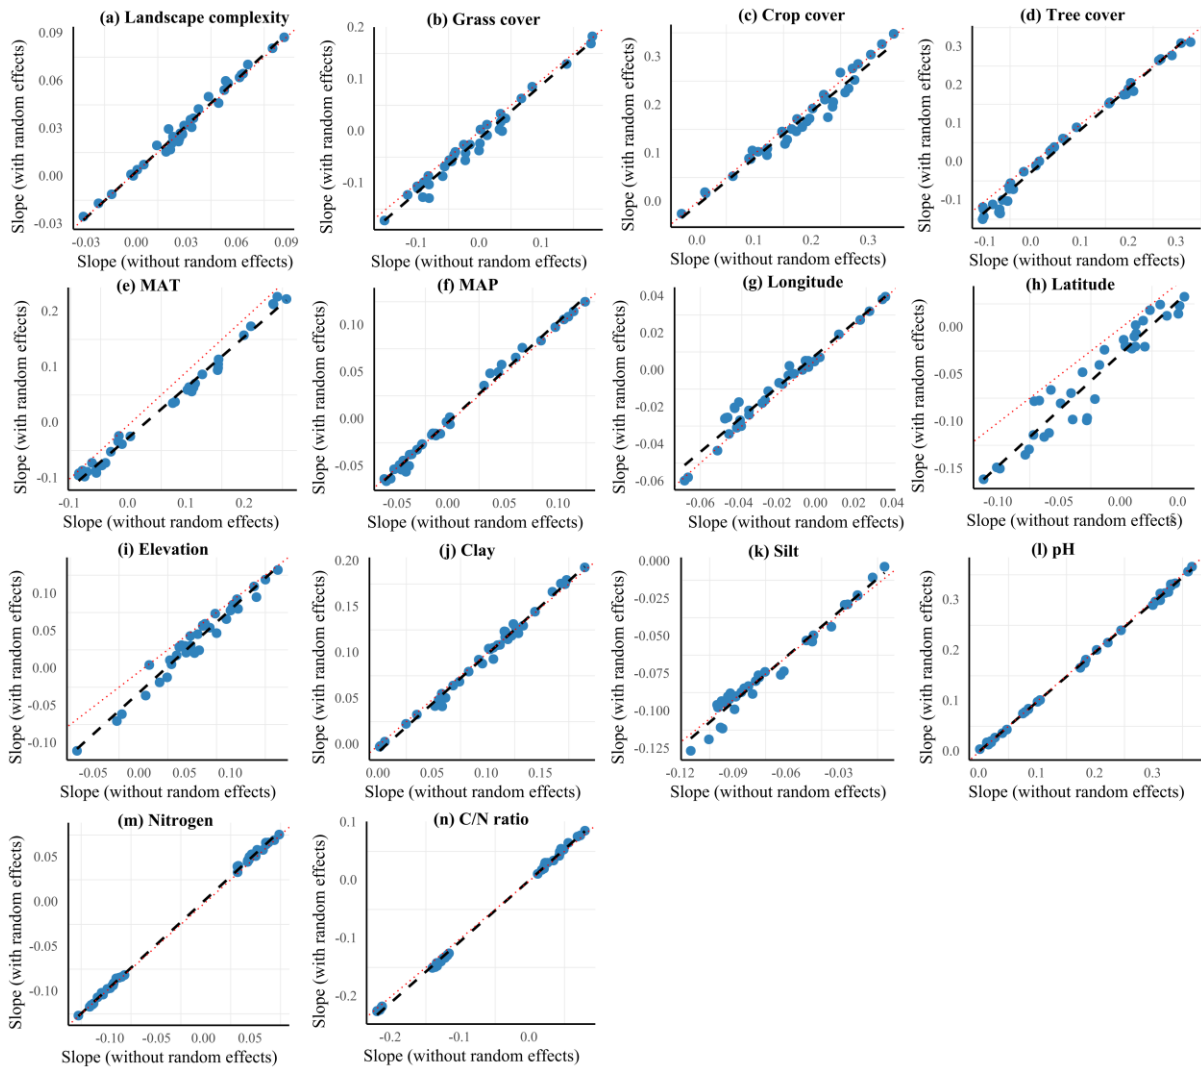

**Supplementary Fig. 29. Consistency of estimate slopes from multivariate Generalized Additive Models for Location, Scale, and Shape (GAMLSS) with and without site as a random effect for each environmental variable.** (a)–(n) show the results for individual environmental variables, including landscape variables of landscape complexity, grass cover, crop cover and tree cover (within the 500 m radius around the sampling coordinate), climatic variables of mean annual temperature (MAT) and mean annual precipitation (MAP), geographic variables of longitude, latitude, and elevation, and soil variables of soil clay content (clay), silt content (silt), pH, total nitrogen content (nitrogen) and soil organic carbon/total nitrogen (C/N) ratio. Points indicate paired slope estimates ( $n = 36$  biologically independent samples), with the dashed red line showing the 1:1 relationship.

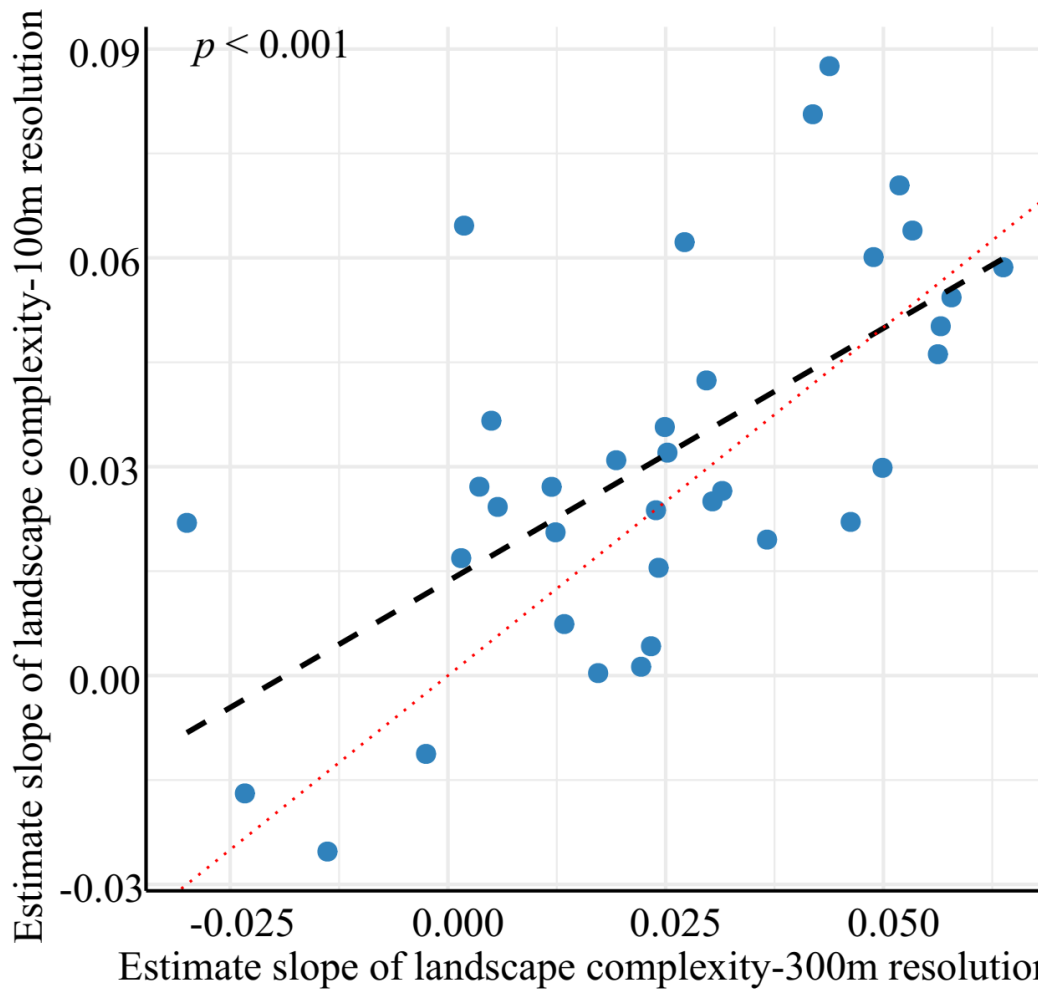

**Supplementary Fig. 30. Comparison of estimate slopes for the relationships between landscape complexity calculated from 100 m- and 300 m-resolution land cover maps and soil pathogenic fungal alpha diversity.** Estimate slopes are obtained from multivariate Generalized Additive Models for Location, Scale, and Shape (GAMLSS) across two fungal groups (LFSA and RA fungi), three alpha diversity indices (richness, Shannon diversity, and relative abundance) and six landscape spatial scales (250–10,000 m radii). Points indicate paired slope estimates ( $n = 36$  biologically independent samples), with the dashed red line showing the 1:1 relationship.

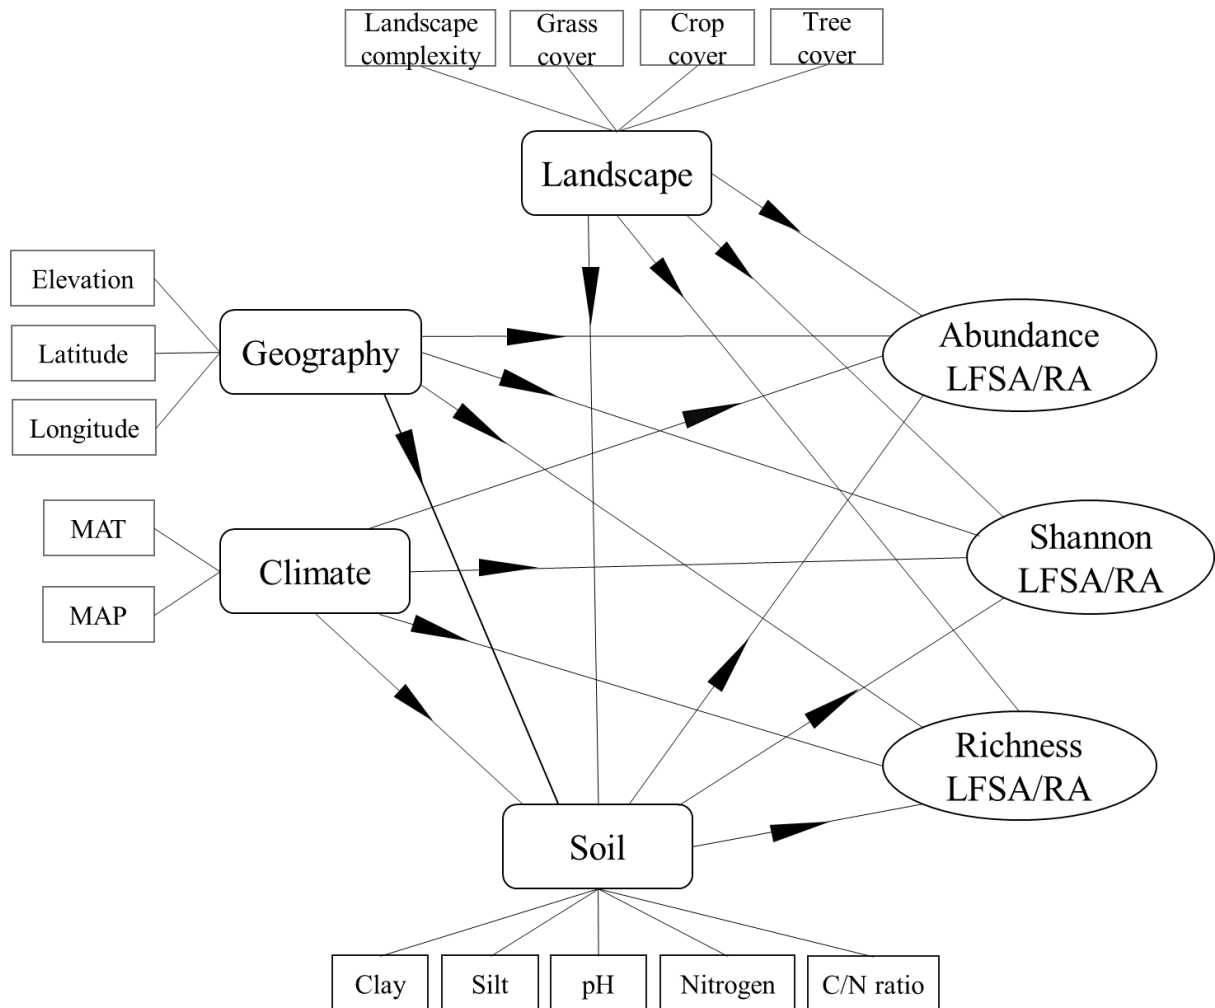

**Supplementary Fig. 31. Hypothesized direct and indirect effects of landscape, geography, climate and soil variables on soil pathogenic fungal alpha diversity based on Partial Least Squares Path Modeling (PLSPM).** The landscape latent variable includes landscape complexity, grass cover, crop cover, and tree cover; the geographic variable includes elevation, latitude, and longitude; the climatic variable includes MAT and MAP; and the soil variable includes soil clay, silt, pH, nitrogen, and C/N ratio. Response variables are the richness, Shannon diversity, and relative abundance of leaf/fruit/seed-associated (LFSA) and root-associated (RA) fungi. The final model was assessed with Goodness-of-Fit (GoF) value.
